# Supplementary material for: Degradation of oxynitride based photoanodes
Source: Royal Society of Chemistry journal article supplement (doi:10.1039/d5ta06368j), 2025-12-15
Supplement: d5ta06368j1.zip [file Electrode_1.xlsx]

## Sheet: Sollwerte
Time [s]	0	1.00032	2.00064	3.00109	4.00141	5.02195	6.00218	7.0025	8.00294	9.00326	10.0037	11.004	12.0044	13.0048	14.0051	15.0056	16.0059	17.0063	18.0067	19.0071	20.0074	21.0079	22.0082	23.0085	24.009	25.0093	26.0097	27.01	28.0104	29.0108	30.0111	31.0116	32.0119	33.0124	34.0127	35.0131	36.0134	37.0138	38.0142	39.0145	40.015	41.0153	42.0156	43.0161	44.0164	45.0168	46.0172	47.0176	48.0179
	0.0270582	0.00642361	0.00577448	0.00546076	0.0052321	0.00504468	0.00493935	0.0048519	0.00475168	0.00470781	0.00467307	0.00458755	0.00458076	0.00450237	0.00448366	0.00446732	0.00445319	0.00439249	0.00438484	0.00433684	0.00431198	0.00433085	0.00428987	0.00429307	0.00423569	0.00420103	0.00417795	0.00416275	0.0041647	0.00414358	0.00414709	0.0041314	0.00411155	0.00407304	0.00408092	0.00407042	0.00404639	0.00403413	0.00403123	0.00404319	0.00398038	0.00398141	0.00397246	0.00396051	0.00397745	0.00396347	0.00392592	0.00395054	0.00389909
Charge [As]	0	0.0167463	0.006101	0.00562015	0.00534814	0.00524393	0.00489332	0.00489719	0.0048039	0.00473126	0.0046925	0.0046317	0.00458599	0.00454338	0.00449436	0.00447773	0.00446159	0.00442461	0.00439042	0.00436258	0.00432571	0.00432358	0.00431165	0.00429276	0.00426651	0.00421963	0.00419117	0.0041716	0.00416539	0.0041558	0.00414658	0.00414131	0.00412271	0.00409434	0.0040782	0.0040773	0.00405962	0.00404188	0.00403429	0.00403842	0.00401379	0.00398209	0.00397813	0.00396847	0.00397017	0.00397205	0.00394627	0.00393981	0.00392599
Summe Charge	2.09904
Time [h]	Charge [As]	H2 [mol]	O2 [mol]	Kammer [mol]	Δ Kammer [mol]	H2 [ppm]	Δ H2 [ppm]	O2 [ppm]	Δ O2 [ppm]
0.5	4.68589	2.42829e-05	1.21414e-05	0.0119441	0.000401971	2033.04	68.4208	1016.52	34.2104
1	8.11309	4.20431e-05	2.10216e-05	0.0119707	0.000402375	3512.16	118.055	1756.08	59.0275
1.5	11.0891	5.74651e-05	2.87325e-05	0.0119938	0.000403271	4791.23	161.097	2395.62	80.5485
2	13.7584	7.12981e-05	3.56491e-05	0.0120145	0.000404049	5934.34	199.572	2967.17	99.7861
2.5	16.2069	8.39865e-05	4.19933e-05	0.0120335	0.000404746	6979.39	234.752	3489.7	117.376
3	18.4665	9.5696e-05	4.7848e-05	0.012051	0.000405386	7940.9	267.125	3970.45	133.563
3.5	20.5873	0.000106686	5.33431e-05	0.0120675	0.000405976	8840.81	297.424	4420.4	148.712
4	22.5826	0.000117026	5.85131e-05	0.0120829	0.000406531	9685.23	325.859	4842.61	162.93
4.5	24.466	0.000126786	6.33932e-05	0.0120976	0.000407052	10480.3	352.636	5240.16	176.318
5	26.2379	0.000135969	6.79843e-05	0.0121113	0.000407544	11226.6	377.774	5613.29	188.887
F	z O2	z H2
96485.3	4	2
Fehler Anfangsmolmenge
Größen	Wert	Fehler_Abs	dn/dx	C*D	E²
Volume [m³]	0.000244	1e-06	48.9022	4.89022e-05	2.39143e-09
R	8.314	Fix	0
T [K]	295.15	1	-4.04274e-05	-4.04274e-05	1.63437e-09
p [Pa]	120000	4000	9.94345e-08	0.000397738	1.58195e-07
n [mol]	0.0119321
Summe	1.62221e-07
f_n (abs)	0.000402767
F_rel	0.0337548
Größen	V/min [ml]
V_12sec [ml]	0.5
ΔV_12sec [ml]	0.1
VGes [ml]	244
Volumensanteil	0.00204918
Δ_Volumensanteil	0.000409836
[truncated: 1,707 more columns]

## Sheet: Error Calculation
Zeit [h]	H2 Haben [ppm]	ΔH2 Haben [ppm]	H2 soll [ppm]	Δ H2 soll [ppm]	Gauß1	Gauß2	Error		Zeit [h]	O2 Haben [ppm]	ΔO2_Haben [ppm]	O2 soll [ppm]	Δ O2 ist [ppm]	Gauß1	Gauß2	Error
0.5	698.037	3.42038	2033.04	68.4208	2.83045e-06	0.00013352	0.0116769		0.5	179.693	5.18365	1016.52	34.2104	2.60039e-05	3.53926e-05	0.00783559
1	1871.98	9.17268	3512.16	118.055	6.82094e-06	0.000320976	0.0181052		1	589.434	12.3743	1756.08	59.0275	4.96538e-05	0.000127292	0.0133021
1.5	3043.83	14.9148	4791.23	161.097	9.69034e-06	0.000456276	0.0215862		1.5	1051.9	20.1123	2395.62	80.5485	7.0484e-05	0.00021797	0.0169839
2	4104.63	20.1127	5934.34	199.572	1.14867e-05	0.000541079	0.0235067		2	1506.36	28.1296	2967.17	99.7861	8.9876e-05	0.000291495	0.0195287
2.5	5061.55	24.8016	6979.39	234.752	1.26277e-05	0.000594995	0.02465		2.5	1945.78	36.1807	3489.7	117.376	0.000107493	0.000351718	0.0214292
3	5912.36	28.9706	7940.9	267.125	1.33099e-05	0.000627295	0.0253102		3	2348.83	43.3592	3970.45	133.563	0.000119257	0.000396017	0.0226996
3.5	6711.48	32.8863	8840.81	297.424	1.38371e-05	0.000652262	0.0258089		3.5	2713.08	49.9928	4420.4	148.712	0.000127906	0.000426353	0.0235427
4	7480.88	36.6563	9685.23	325.859	1.43244e-05	0.000675345	0.0262616		4	3069.52	56.7576	4842.61	162.93	0.000137369	0.000454802	0.0243346
4.5	8250.4	40.427	10480.3	352.636	1.48797e-05	0.000701625	0.0267676		4.5	3420.14	63.0477	5240.16	176.318	0.00014476	0.000482284	0.0250409
5	8929.01	43.7522	11226.6	377.774	1.51881e-05	0.000716274	0.0270455		5	3727.32	68.3566	5613.29	188.887	0.000148295	0.000499259	0.0254471

## Sheet: Messwerte 
Entstandene Sauerstoff und Wasserstoffmenge											Messdaten
O2_Mess [ppm]	ΔO2_Mess [ppm]	O2_Back [ppm]	ΔO2_Back [ppm]	O2_Ekt [ppm]	ΔO2_Abs [ppm]	ΔO2_Rel	H2 Ekt [ppm]	ΔH2_Abs [ppm]	ΔH2_Rel		H2	O2	N2
194.954	3.50917	15.2609	3.81522	179.693	5.18365	0.0288472	698.037	3.42038	0.0049		0.892901	0.376374	0.00910606
611.983	11.0157	22.5487	5.63717	589.434	12.3743	0.0209935	1871.98	9.17268	0.0049		0.82504	0.345957	0.00985768
1074.08	19.3333	22.1729	5.54322	1051.9	20.1123	0.01912	3043.83	14.9148	0.0049		0.748088	0.310788	0.00958872
1529.47	27.5304	23.1014	5.77534	1506.36	28.1296	0.0186739	4104.63	20.1127	0.0049		0.671148	0.274399	0.00772809
1973.32	35.5197	27.5374	6.88435	1945.78	36.1807	0.0185945	5061.55	24.8016	0.0049		0.591236	0.237696	0.00703173
2376.96	42.7853	28.1269	7.03173	2348.83	43.3592	0.0184599	5912.36	28.9706	0.0049		0.506155	0.197332	0.00688435
2743.99	49.3918	30.9124	7.72809	2713.08	49.9928	0.0184266	6711.48	32.8863	0.0049		0.410463	0.152947	0.00577534
3107.88	55.9418	38.3549	9.58872	3069.52	56.7576	0.0184907	7480.88	36.6563	0.0049		0.304383	0.107408	0.00554322
3459.57	62.2723	39.4307	9.85768	3420.14	63.0477	0.0184342	8250.4	40.427	0.0049		0.187198	0.0611983	0.00563717
3763.74	67.7474	36.4242	9.10606	3727.32	68.3566	0.0183394	8929.01	43.7522	0.0049		0.0698037	0.0194954	0.00381522
											0	0	0

## Sheet: Vergleich
Wasserstoff										Sauerstoff									Wasserstoff zu Sauerstoff Ratio
Zeit [h]	Soll [ppm]	Ist [ppm]	Ratio Mess	Fehler	Ratio Ekt	Fehler	Ratio Ges	Fehler		Soll [ppm]	Ist [ppm]	Ratio Mess	Fehler	Ratio Ekt	Fehler	Ratio Ges	Fehler		Ratio Mess	Fehler	Ratio Ekt	Fehler	Ratio Ges	Fehler
0.5	2033.04	698.037	0.343346	0.0116769	0.567817	0.0110802	0.604677	0.0237093		1016.52	179.693	0.176773	0.00783559	0.344458	0.0139013	0.513191	0.0307635		3.8846	0.217031	3.42432	0.171219	2.26883	0.359877
1	3512.16	1871.98	0.532998	0.0181052	0.918275	0.0138437	0.580434	0.0215711		1756.08	589.434	0.335653	0.0133021	0.731272	0.0149234	0.458999	0.0204605		3.17589	0.165769	2.53732	0.0659304	2.50334	0.286567
1.5	4791.23	3043.83	0.635292	0.0215862	0.993584	0.006	0.639394	0.0220661		2395.62	1051.9	0.439095	0.0169839	0.841492	0.0156013	0.521805	0.0223819		2.89364	0.148977	2.33962	0.0566894	2.4736	0.275961
2	5934.34	4104.63	0.691675	0.0235067	0.993584	0.006	0.696142	0.0240291		2967.17	1506.36	0.507677	0.0195287	0.915091	0.006	0.554783	0.0216485		2.72486	0.139865	2.18454	0.0549119	2.49468	0.281255
2.5	6979.39	5061.55	0.725213	0.02465	0.993584	0.006	0.729896	0.0251977		3489.7	1945.78	0.557579	0.0214292	0.915091	0.006	0.609315	0.0237559		2.60129	0.133464	2.18454	0.05181	2.38154	0.267231
3	7940.9	5912.36	0.744545	0.0253102	0.993584	0.006	0.749353	0.0258724		3970.45	2348.83	0.591578	0.0226996	0.915091	0.006	0.646469	0.0251654		2.51715	0.129038	2.18454	0.0555143	2.30451	0.269294
3.5	8840.81	6711.48	0.759148	0.0258089	0.993584	0.006	0.76405	0.0263821		4420.4	2713.08	0.613763	0.0235427	0.915091	0.006	0.670712	0.0261003		2.47375	0.126794	2.18454	0.0541247	2.26478	0.263795
4	9685.23	7480.88	0.7724	0.0262616	0.993584	0.006	0.777388	0.0268448		4842.61	3069.52	0.633856	0.0243346	0.915091	0.006	0.69267	0.0269775		2.43715	0.124983	2.18454	0.0566001	2.23126	0.266277
4.5	10480.3	8250.4	0.787228	0.0267676	0.993584	0.006	0.792311	0.027362		5240.16	3420.14	0.652679	0.0250409	0.915091	0.006	0.713239	0.0277611		2.4123	0.123667	2.18454	0.0573068	2.20852	0.265997
5	11226.6	8929.01	0.795345	0.0270455	0.993584	0.006	0.800481	0.0276461		5613.29	3727.32	0.664017	0.0254471	0.915091	0.006	0.725629	0.0282123		2.39556	0.122735	2.18454	0.056368	2.19319	0.263092
Zeit_1 [h]	Soll [ppm]	Ist [ppm]	Ratio Mess	Fehler	Ratio Ekt	Fehler	Ratio Ges	Fehler		Soll [ppm]	Ist [ppm]	Ratio Mess	Fehler	Ratio Ekt	Fehler	Ratio Ges	Fehler		Ratio Mess	Fehler	Ratio Ekt	Fehler	Ratio Ges	Fehler
1.5	1279.07	1171.85	0.916176	0.0215862	0.993584	0.006	0.922092	0.0224279		639.535	462.468	0.723131	0.0169839	0.841492	0.0156013	0.859345	0.0257138		2.53391	0.0842981	2.33962	0.0566894	2.16609	0.240162
2	2422.18	2232.66	0.921757	0.0235067	0.993584	0.006	0.927709	0.0243127		1211.09	916.93	0.757112	0.0195287	0.915091	0.006	0.827363	0.0220194		2.43493	0.0883202	2.18454	0.0549119	2.22923	0.250147
2.5	3467.23	3189.57	0.919919	0.02465	0.993584	0.006	0.925859	0.0254314		1733.62	1356.35	0.78238	0.0214292	0.915091	0.006	0.854975	0.0240792		2.35159	0.0901066	2.18454	0.05181	2.15293	0.240553
3	4428.74	4040.39	0.91231	0.0253102	0.993584	0.006	0.918201	0.0260701		2214.37	1759.4	0.794536	0.0226996	0.915091	0.006	0.868259	0.0254508		2.29646	0.0914527	2.18454	0.0555143	2.10246	0.245843
3.5	5328.65	4839.51	0.908205	0.0258089	0.993584	0.006	0.91407	0.0265556		2664.32	2123.65	0.797067	0.0235427	0.915091	0.006	0.871025	0.0263534		2.27887	0.0934049	2.18454	0.0541247	2.08636	0.242909
4	6173.07	5608.9	0.908608	0.0262616	0.993584	0.006	0.914475	0.0270019		3086.53	2480.09	0.803519	0.0243346	0.915091	0.006	0.878075	0.0272086		2.26157	0.0946777	2.18454	0.0566001	2.07052	0.247304
4.5	6968.16	6378.43	0.915367	0.0267676	0.993584	0.006	0.921278	0.0275089		3484.08	2830.71	0.812469	0.0250409	0.915091	0.006	0.887856	0.0279767		2.2533	0.095733	2.18454	0.0573068	2.06295	0.248593
5	7714.43	7057.04	0.914784	0.0270455	0.993584	0.006	0.920691	0.0277822		3857.21	3137.89	0.813511	0.0254471	0.915091	0.006	0.888995	0.0284126		2.24898	0.0967991	2.18454	0.056368	2.05899	0.246946
							0.920547	0.0258863								0.866987	0.0259018
Zeit_2 [h]	Soll [ppm]	Ist [ppm]	Ratio Mess	Fehler	Ratio Ekt	Fehler	Ratio Ges	Fehler		Soll [ppm]	Ist [ppm]	Ratio Mess	Fehler	Ratio Ekt	Fehler	Ratio Ges	Fehler		Ratio Mess	Fehler	Ratio Ekt	Fehler	Ratio Ges	Fehler
2.5	1045.06	956.914	0.915657	0.02465	0.993584	0.006	0.92157	0.0254257		522.528	439.418	0.840945	0.0214292	0.915091	0.006	0.918974	0.0241803		2.17769	0.0807233	2.18454	0.05181	1.99372	0.229665
3	2006.57	1807.73	0.900906	0.0253102	0.993584	0.006	0.906723	0.0260554		1003.28	842.469	0.839711	0.0226996	0.915091	0.006	0.917626	0.0255251		2.14575	0.0836581	2.18454	0.0555143	1.96448	0.236195
3.5	2906.47	2606.85	0.896912	0.0258089	0.993584	0.006	0.902703	0.0265414		1453.24	1206.72	0.830364	0.0235427	0.915091	0.006	0.907411	0.0264062		2.16029	0.0872678	2.18454	0.0541247	1.97779	0.235341
4	3750.89	3376.24	0.900117	0.0262616	0.993584	0.006	0.905929	0.0269913		1875.45	1563.16	0.833486	0.0243346	0.915091	0.006	0.910823	0.0272548		2.15988	0.0891495	2.18454	0.0566001	1.97742	0.240614
4.5	4545.99	4145.77	0.911962	0.0267676	0.993584	0.006	0.917851	0.0275047		2272.99	1913.78	0.841963	0.0250409	0.915091	0.006	0.920087	0.0280214		2.16627	0.0905194	2.18454	0.0573068	1.98327	0.242682
5	5292.25	4824.38	0.911593	0.0270455	0.993584	0.006	0.917479	0.0277783		2646.13	2220.96	0.839324	0.0254471	0.915091	0.006	0.917203	0.0284511		2.17221	0.0921444	2.18454	0.056368	1.98871	0.241726
							0.910137	0.0269742								0.915354	0.0266398						1.9809	0.237704
Jeder MP	Soll [ppm]	Ist [ppm]	Ratio Mess	Fehler	Ratio Ekt	Fehler	Ratio Ges	Fehler		Soll [ppm]	Ist [ppm]	Ratio Mess	Fehler	Ratio Ekt	Fehler	Ratio Ges	Fehler		Ratio Mess	Fehler	Ratio Ekt	Fehler	Ratio Ges	Fehler
0.5	2033.04	698.037	0.343346	0.0116769	0.567817	0.0110802	0.604677	0.0237093		1016.52	179.693	0.176773	0.00783559	0.344458	0.0139013	0.513191	0.0307635		3.8846	0.217031	3.42432	0.171219	2.26883	0.359877
1	1479.12	1173.94	0.793676	0.0181052	0.918275	0.0138437	0.864311	0.0236331		739.558	409.741	0.554034	0.0133021	0.731272	0.0149234	0.757631	0.0238735		2.86508	0.0948871	2.53732	0.0659304	2.25835	0.253526
1.5	1279.07	1171.85	0.916176	0.0215862	0.993584	0.006	0.922092	0.0224279		639.535	462.468	0.723131	0.0169839	0.841492	0.0156013	0.859345	0.0257138		2.53391	0.0842981	2.33962	0.0566894	2.16609	0.240162
2	1143.11	1060.8	0.928002	0.0235067	0.993584	0.006	0.933994	0.0243215		571.553	454.462	0.795135	0.0195287	0.915091	0.006	0.868913	0.0220881		2.3342	0.0823559	2.18454	0.0549119	2.13701	0.243726
2.5	1045.06	956.914	0.915657	0.02465	0.993584	0.006	0.92157	0.0254257		522.528	439.418	0.840945	0.0214292	0.915091	0.006	0.918974	0.0241803		2.17769	0.0807233	2.18454	0.05181	1.99372	0.229665
3	961.511	850.814	0.884872	0.0253102	0.993584	0.006	0.890586	0.0260351		480.755	403.051	0.83837	0.0226996	0.915091	0.006	0.91616	0.0255229		2.11093	0.083141	2.18454	0.0555143	1.93261	0.23432
3.5	899.906	799.122	0.888006	0.0258089	0.993584	0.006	0.89374	0.0265303		449.953	364.247	0.809522	0.0235427	0.915091	0.006	0.884635	0.0263729		2.1939	0.0902034	2.18454	0.0541247	2.00857	0.237875
4	844.419	769.391	0.911148	0.0262616	0.993584	0.006	0.917031	0.027005		422.21	356.443	0.844234	0.0243346	0.915091	0.006	0.922568	0.0272718		2.15852	0.0879868	2.18454	0.0566001	1.97618	0.240188
4.5	795.094	769.526	0.967843	0.0267676	0.993584	0.006	0.974093	0.0275752		397.547	350.618	0.881955	0.0250409	0.915091	0.006	0.963789	0.0280845		2.19477	0.0869926	2.18454	0.0573068	2.00936	0.243011
5	746.263	678.61	0.909343	0.0270455	0.993584	0.006	0.915215	0.0277756		373.132	307.179	0.823245	0.0254471	0.915091	0.006	0.899632	0.028427		2.20917	0.094764	2.18454	0.056368	2.02254	0.244367
							0.92104	0.025887								0.910667	0.0259925						2.01143	0.239022
