# Supplementary material for: Degradation of oxynitride based photoanodes
Source: Royal Society of Chemistry journal article supplement (doi:10.1039/d5ta06368j), 2025-12-15
Supplement: d5ta06368j1.zip [file Electrode_2.xlsx]

## Sheet: Sollwerte
Time [s]	0	1.00032	2.00064	3.00109	4.00141	5.02195	6.00218	7.0025	8.00294	9.00326	10.0037	11.004	12.0044	13.0048	14.0051	15.0056	16.0059	17.0063	18.0067	19.0071	20.0074	21.0079	22.0082	23.0085	24.009	25.0093	26.0097	27.01	28.0104	29.0108	30.0111	31.0116	32.0119	33.0124	34.0127	35.0131	36.0134	37.0138	38.0142	39.0145	40.015	41.0153	42.0156	43.0161	44.0164	45.0168	46.0172	47.0176	48.0179
	0.0239205	0.00692801	0.00594249	0.00538773	0.00504958	0.00481894	0.00466165	0.00451747	0.00439784	0.00432486	0.00424747	0.0041515	0.00409403	0.00405548	0.00401861	0.00394432	0.00392584	0.00387098	0.00387036	0.00381671	0.00379947	0.00376415	0.00373605	0.00371895	0.00369376	0.00365885	0.00363652	0.00360965	0.00358087	0.00358116	0.00355383	0.00354339	0.00352742	0.00349872	0.00346105	0.0034694	0.00344611	0.003434	0.00341015	0.00340143	0.00340053	0.00337797	0.00335292	0.00334485	0.00332936	0.00333272	0.00329415	0.00327129	0.00328507
Charge [As]	0	0.0154292	0.00643731	0.00566766	0.00522032	0.00503561	0.00464658	0.00459103	0.00445962	0.00436275	0.00428805	0.00420074	0.00412441	0.00407638	0.00403826	0.00398346	0.00393626	0.00389997	0.00387222	0.00384507	0.00380923	0.0037837	0.00375123	0.00372862	0.00370821	0.00367741	0.00364914	0.00362417	0.0035967	0.00358245	0.00356857	0.00355038	0.00353647	0.00351483	0.00348093	0.00346661	0.00345879	0.00344143	0.00342344	0.00340681	0.00340268	0.00339027	0.00336645	0.00335056	0.00333811	0.00333237	0.00331476	0.00328403	0.00327916
Time [h]	Charge [As]	H2 [mol]	O2 [mol]	Kammer [mol]	Δ Kammer [mol]	H2 [ppm]	Δ H2 [ppm]	O2 [ppm]	Δ O2 [ppm]
0.5	3.58018	1.8553e-05	9.27649e-06	0.0119355	0.000401971	1554.43	52.3512	777.217	26.1756
1	6.0257	3.1226e-05	1.5613e-05	0.0119545	0.000402085	2612.07	87.8557	1306.03	43.9279
1.5	8.09426	4.19455e-05	2.09728e-05	0.0119706	0.000402725	3504.06	117.887	1752.03	58.9435
2	9.93432	5.1481e-05	2.57405e-05	0.0119848	0.000403266	4295.51	144.535	2147.76	72.2677
2.5	11.604	6.01336e-05	3.00668e-05	0.0119978	0.000403746	5012.06	168.665	2506.03	84.3324
3	13.1757	6.82782e-05	3.41391e-05	0.01201	0.000404183	5685.12	191.327	2842.56	95.6634
3.5	14.6433	7.58834e-05	3.79417e-05	0.0120214	0.000404593	6312.38	212.451	3156.19	106.226
4	16.0511	8.31789e-05	4.15894e-05	0.0120323	0.000404977	6912.98	232.674	3456.49	116.337
4.5	17.3889	9.01116e-05	4.50558e-05	0.0120426	0.000405345	7482.71	251.861	3741.35	125.931
5	18.6711	9.67559e-05	4.8378e-05	0.0120526	0.000405694	8027.81	270.219	4013.91	135.109
F	z O2	z H2
96485.3	4	2
Fehler Anfangsmolmenge
Größen	Wert	Fehler_Abs	dn/dx	C*D	E²
Volume [m³]	0.000244	1e-06	48.9022	4.89022e-05	2.39143e-09
R	8.314	Fix	0
T [K]	295.15	1	-4.04274e-05	-4.04274e-05	1.63437e-09
p [Pa]	120000	4000	9.94345e-08	0.000397738	1.58195e-07
n [mol]	0.0119321
Summe	1.62221e-07
f_n (abs)	0.000402767
F_rel	0.0337548
Größen	V/min [ml]
V_12sec [ml]	0.5
ΔV_12sec [ml]	0.1
VGes [ml]	244
Volumensanteil	0.00204918
Δ_Volumensanteil	0.000409836
[truncated: 1,707 more columns]

## Sheet: Error Calculation
Zeit [h]	H2 Haben [ppm]	ΔH2 Haben [ppm]	H2 soll [ppm]	Δ H2 soll [ppm]	Gauß1	Gauß2	Error		Zeit [h]	O2 Haben [ppm]	ΔO2_Haben [ppm]	O2 soll [ppm]	Δ O2 ist [ppm]	Gauß1	Gauß2	Error
0.5	584.633	2.8647	1554.43	52.3512	3.39636e-06	0.000160446	0.0128001		0.5	154.479	6.08115	777.217	26.1756	6.12189e-05	4.48085e-05	0.010297
1	1486.79	7.28528	2612.07	87.8557	7.77901e-06	0.000366526	0.019347		1	461.742	10.1471	1306.03	43.9279	6.03633e-05	0.000141405	0.0142045
1.5	2326.83	11.4015	3504.06	117.887	1.05872e-05	0.000499087	0.022576		1.5	777.584	15.7246	1752.03	58.9435	8.05525e-05	0.000222947	0.0174212
2	3051.52	14.9524	4295.51	144.535	1.2117e-05	0.000571375	0.0241556		2	1112.51	21.2589	2147.76	72.2677	9.79744e-05	0.00030378	0.0200438
2.5	3695.69	18.1089	5012.06	168.665	1.30542e-05	0.000615707	0.0250751		2.5	1403.05	26.5364	2506.03	84.3324	0.000112128	0.000354967	0.0216124
3	4274.15	20.9433	5685.12	191.327	1.3571e-05	0.000640164	0.0255682		3	1645.84	30.9519	2842.56	95.6634	0.000118565	0.000379687	0.0223216
3.5	4807.37	23.5561	6312.38	212.451	1.39258e-05	0.000656991	0.0259021		3.5	1887.94	35.1008	3156.19	106.226	0.000123683	0.000405302	0.0229997
4	5308.38	26.011	6912.98	232.674	1.41574e-05	0.000667972	0.0261176		4	2113.14	39.1597	3456.49	116.337	0.000128353	0.0004234	0.0234894
4.5	5779.1	28.3176	7482.71	251.861	1.43217e-05	0.000675784	0.0262699		4.5	2304.68	42.9119	3741.35	125.931	0.000131552	0.000429901	0.023695
5	6230.21	30.528	8027.81	270.219	1.44612e-05	0.000682415	0.0263984		5	2533.88	46.8808	4013.91	135.109	0.000136413	0.000451516	0.0242473

## Sheet: Messwerte 
Entstandene Sauerstoff und Wasserstoffmenge											Messdaten
O2_Mess [ppm]	ΔO2_Mess [ppm]	O2_Back [ppm]	ΔO2_Back [ppm]	O2_Ekt [ppm]	ΔO2_Abs [ppm]	ΔO2_Rel	H2 Ekt [ppm]	ΔH2_Abs [ppm]	ΔH2_Rel		H2	O2	N2
175.274	3.15492	20.7949	5.19873	154.479	6.08115	0.0393656	584.633	2.8647	0.0049		0.623021	0.2566	0.00803021
482.707	8.68872	20.9644	5.2411	461.742	10.1471	0.0219756	1486.79	7.28528	0.0049		0.57791	0.233817	0.00837286
802.447	14.444	24.8625	6.21563	777.584	15.7246	0.0202224	2326.83	11.4015	0.0049		0.530838	0.214096	0.00695436
1135.82	20.4448	23.3077	5.82692	1112.51	21.2589	0.0191089	3051.52	14.9524	0.0049		0.480737	0.191459	0.00666329
1429.11	25.724	26.0636	6.51591	1403.05	26.5364	0.0189134	3695.69	18.1089	0.0049		0.427415	0.167411	0.00706857
1674.11	30.134	28.2743	7.06857	1645.84	30.9519	0.0188062	4274.15	20.9433	0.0049		0.369569	0.142911	0.00651591
1914.59	34.4626	26.6532	6.66329	1887.94	35.1008	0.0185922	4807.37	23.5561	0.0049		0.305152	0.113582	0.00582692
2140.96	38.5372	27.8174	6.95436	2113.14	39.1597	0.0185315	5308.38	26.011	0.0049		0.232683	0.0802447	0.00621563
2338.17	42.0871	33.4914	8.37286	2304.68	42.9119	0.0186194	5779.1	28.3176	0.0049		0.148679	0.0482707	0.0052411
2566	46.188	32.1208	8.03021	2533.88	46.8808	0.0185016	6230.21	30.528	0.0049		0.0584633	0.0175274	0.00519873
											0	0	0.00344494

## Sheet: Vergleich
Wasserstoff										Sauerstoff									Wasserstoff zu Sauerstoff Ratio
Zeit [h]	Soll [ppm]	Ist [ppm]	Ratio Mess	Fehler	Ratio Ekt	Fehler	Ratio Ges	Fehler		Soll [ppm]	Ist [ppm]	Ratio Mess	Fehler	Ratio Ekt	Fehler	Ratio Ges	Fehler		Ratio Mess	Fehler	Ratio Ekt	Fehler	Ratio Ges	Fehler
0.5	1554.43	584.633	0.376106	0.0128001	0.567817	0.0110802	0.662373	0.0259853		777.217	154.479	0.198759	0.010297	0.344458	0.0139013	0.577019	0.037893		3.78455	0.234586	3.42432	0.171219	2.2104	0.359575
1	2612.07	1486.79	0.569202	0.019347	0.918275	0.0138437	0.619859	0.0230482		1306.03	461.742	0.353546	0.0142045	0.731272	0.0149234	0.483467	0.0217865		3.21996	0.169454	2.53732	0.0659304	2.53807	0.289466
1.5	3504.06	2326.83	0.664039	0.022576	0.993584	0.006	0.668327	0.0230774		1752.03	777.584	0.443819	0.0174212	0.841492	0.0156013	0.52742	0.0228959		2.99238	0.155393	2.33962	0.0566894	2.55801	0.282182
2	4295.51	3051.52	0.710397	0.0241556	0.993584	0.006	0.714984	0.024692		2147.76	1112.51	0.517989	0.0200438	0.915091	0.006	0.566051	0.0222158		2.74291	0.141294	2.18454	0.0549119	2.51119	0.282588
2.5	5012.06	3695.69	0.737359	0.0250751	0.993584	0.006	0.742121	0.0256318		2506.03	1403.05	0.559869	0.0216124	0.915091	0.006	0.611818	0.023956		2.63404	0.135509	2.18454	0.05181	2.41153	0.269415
3	5685.12	4274.15	0.751813	0.0255682	0.993584	0.006	0.756667	0.0261359		2842.56	1645.84	0.578998	0.0223216	0.915091	0.006	0.632722	0.024743		2.59694	0.133506	2.18454	0.0555143	2.37756	0.274516
3.5	6312.38	4807.37	0.761578	0.0259021	0.993584	0.006	0.766495	0.026477		3156.19	1887.94	0.598169	0.0229997	0.915091	0.006	0.653671	0.0254965		2.54636	0.130715	2.18454	0.0541247	2.33126	0.268479
4	6912.98	5308.38	0.767885	0.0261176	0.993584	0.006	0.772844	0.0266973		3456.49	2113.14	0.611354	0.0234894	0.915091	0.006	0.66808	0.02604		2.51208	0.128904	2.18454	0.0566001	2.29987	0.271137
4.5	7482.71	5779.1	0.772327	0.0262699	0.993584	0.006	0.777314	0.0268529		3741.35	2304.68	0.616002	0.023695	0.915091	0.006	0.673159	0.0262671		2.50755	0.128756	2.18454	0.0573068	2.29572	0.272248
5	8027.81	6230.21	0.776079	0.0263984	0.993584	0.006	0.78109	0.0269843		4013.91	2533.88	0.631275	0.0242473	0.915091	0.006	0.689849	0.0268804		2.45877	0.126151	2.18454	0.056368	2.25106	0.267251
Zeit_1 [h]	Soll [ppm]	Ist [ppm]	Ratio Mess	Fehler	Ratio Ekt	Fehler	Ratio Ges	Fehler		Soll [ppm]	Ist [ppm]	Ratio Mess	Fehler	Ratio Ekt	Fehler	Ratio Ges	Fehler		Ratio Mess	Fehler	Ratio Ekt	Fehler	Ratio Ges	Fehler
1.5	891.992	840.039	0.941756	0.022576	0.993584	0.006	0.947837	0.0234316		445.996	315.842	0.708172	0.0174212	0.841492	0.0156013	0.841567	0.0259239		2.65968	0.0913569	2.33962	0.0566894	2.2736	0.247364
2	1683.45	1564.73	0.929478	0.0241556	0.993584	0.006	0.93548	0.0249592		841.723	650.77	0.773141	0.0200438	0.915091	0.006	0.844879	0.0225933		2.40442	0.0882625	2.18454	0.0549119	2.2013	0.248722
2.5	2400	2208.9	0.920376	0.0250751	0.993584	0.006	0.926319	0.0258495		1200	941.306	0.784423	0.0216124	0.915091	0.006	0.857208	0.0242773		2.34663	0.0909261	2.18454	0.05181	2.1484	0.240588
3	3073.06	2787.36	0.907031	0.0255682	0.993584	0.006	0.912887	0.0263172		1536.53	1184.09	0.77063	0.0223216	0.915091	0.006	0.842135	0.0250099		2.354	0.0951437	2.18454	0.0555143	2.15514	0.249709
3.5	3700.32	3320.58	0.897376	0.0259021	0.993584	0.006	0.903171	0.0266337		1850.16	1426.19	0.770849	0.0229997	0.915091	0.006	0.842374	0.0257335		2.32828	0.0966553	2.18454	0.0541247	2.1316	0.246259
4	4300.92	3821.59	0.888552	0.0261176	0.993584	0.006	0.894289	0.0268353		2150.46	1651.4	0.767928	0.0234894	0.915091	0.006	0.839182	0.026252		2.31415	0.0981705	2.18454	0.0566001	2.11866	0.25094
4.5	4870.64	4292.31	0.881261	0.0262699	0.993584	0.006	0.886951	0.0269765		2435.32	1842.94	0.756753	0.023695	0.915091	0.006	0.82697	0.0264552		2.32906	0.10069	2.18454	0.0573068	2.13231	0.253839
5	5415.75	4743.42	0.875858	0.0263984	0.993584	0.006	0.881513	0.0270969		2707.87	2072.13	0.765226	0.0242473	0.915091	0.006	0.836229	0.0270584		2.28915	0.100108	2.18454	0.056368	2.09577	0.249955
							0.911056	0.0260125								0.841318	0.0254129
Zeit_2 [h]	Soll [ppm]	Ist [ppm]	Ratio Mess	Fehler	Ratio Ekt	Fehler	Ratio Ges	Fehler		Soll [ppm]	Ist [ppm]	Ratio Mess	Fehler	Ratio Ekt	Fehler	Ratio Ges	Fehler		Ratio Mess	Fehler	Ratio Ekt	Fehler	Ratio Ges	Fehler
2.5	716.55	644.173	0.898992	0.0250751	0.993584	0.006	0.904797	0.0258217		358.275	290.536	0.810929	0.0216124	0.915091	0.006	0.886173	0.024322		2.21719	0.0855354	2.18454	0.05181	2.02989	0.232969
3	1389.61	1222.63	0.879836	0.0255682	0.993584	0.006	0.885518	0.0262831		694.806	533.324	0.767588	0.0223216	0.915091	0.006	0.838811	0.0250051		2.29247	0.0942468	2.18454	0.0555143	2.09881	0.246538
3.5	2016.87	1755.85	0.870582	0.0259021	0.993584	0.006	0.876203	0.0266009		1008.44	775.422	0.768936	0.0229997	0.915091	0.006	0.840283	0.0257305		2.26438	0.0955313	2.18454	0.0541247	2.07309	0.242926
4	2617.47	2256.86	0.862229	0.0261176	0.993584	0.006	0.867797	0.0268035		1308.73	1000.63	0.764575	0.0234894	0.915091	0.006	0.835518	0.026247		2.25545	0.0973085	2.18454	0.0566001	2.06491	0.247865
4.5	3187.2	2727.58	0.855793	0.0262699	0.993584	0.006	0.861319	0.0269462		1593.6	1192.17	0.748097	0.023695	0.915091	0.006	0.817512	0.0264426		2.28792	0.100915	2.18454	0.0573068	2.09464	0.251961
5	3732.3	3178.7	0.851672	0.0263984	0.993584	0.006	0.857171	0.0270684		1866.15	1421.36	0.761656	0.0242473	0.915091	0.006	0.832328	0.0270533		2.23637	0.0993666	2.18454	0.056368	2.04745	0.247197
							0.869602	0.0267404								0.841771	0.0258001						2.06813	0.244909
Jeder MP	Soll [ppm]	Ist [ppm]	Ratio Mess	Fehler	Ratio Ekt	Fehler	Ratio Ges	Fehler		Soll [ppm]	Ist [ppm]	Ratio Mess	Fehler	Ratio Ekt	Fehler	Ratio Ges	Fehler		Ratio Mess	Fehler	Ratio Ekt	Fehler	Ratio Ges	Fehler
0.5	1554.43	584.633	0.376106	0.0128001	0.567817	0.0110802	0.662373	0.0259853		777.217	154.479	0.198759	0.010297	0.344458	0.0139013	0.577019	0.037893		3.78455	0.234586	3.42432	0.171219	2.2104	0.359575
1	1057.63	902.159	0.853	0.019347	0.918275	0.0138437	0.928915	0.0252984		528.815	307.264	0.581042	0.0142045	0.731272	0.0149234	0.794563	0.0253028		2.93611	0.0979123	2.53732	0.0659304	2.31433	0.257085
1.5	891.992	840.039	0.941756	0.022576	0.993584	0.006	0.947837	0.0234316		445.996	315.842	0.708172	0.0174212	0.841492	0.0156013	0.841567	0.0259239		2.65968	0.0913569	2.33962	0.0566894	2.2736	0.247364
2	791.454	724.687	0.91564	0.0241556	0.993584	0.006	0.921553	0.0249403		395.727	334.929	0.846363	0.0200438	0.915091	0.006	0.924895	0.0227276		2.16371	0.0767068	2.18454	0.0549119	1.98092	0.233935
2.5	716.55	644.173	0.898992	0.0250751	0.993584	0.006	0.904797	0.0258217		358.275	290.536	0.810929	0.0216124	0.915091	0.006	0.886173	0.024322		2.21719	0.0855354	2.18454	0.05181	2.02989	0.232969
3	673.061	578.458	0.859443	0.0255682	0.993584	0.006	0.864992	0.0262581		336.531	242.789	0.721446	0.0223216	0.915091	0.006	0.788388	0.0249344		2.38255	0.102265	2.18454	0.0555143	2.18128	0.253372
3.5	627.261	533.222	0.850079	0.0259021	0.993584	0.006	0.855568	0.0265763		313.631	242.098	0.771921	0.0229997	0.915091	0.006	0.843545	0.0257351		2.2025	0.0938638	2.18454	0.0541247	2.01644	0.239467
4	600.598	501.007	0.834181	0.0261176	0.993584	0.006	0.839567	0.0267707		300.299	225.203	0.749931	0.0234894	0.915091	0.006	0.819515	0.0262253		2.22469	0.0985249	2.18454	0.0566001	2.03675	0.246794
4.5	569.728	470.723	0.826224	0.0262699	0.993584	0.006	0.831559	0.0269121		284.864	191.542	0.672396	0.023695	0.915091	0.006	0.734786	0.026338		2.45755	0.116643	2.18454	0.0573068	2.24995	0.26538
5	545.102	451.113	0.827575	0.0263984	0.993584	0.006	0.832919	0.0270408		272.551	229.197	0.840932	0.0242473	0.915091	0.006	0.91896	0.0271735		1.96823	0.0846317	2.18454	0.056368	1.80196	0.229128
							0.874849	0.025969								0.84518	0.0253509						2.04246	0.243006
