# Supplementary material for: Degradation of oxynitride based photoanodes
Source: Royal Society of Chemistry journal article supplement (doi:10.1039/d5ta06368j), 2025-12-15
Supplement: d5ta06368j1.zip [file Electrode_3.xlsx]

## Sheet: Sollwerte
Time [s]	0	1.00032	2.00064	3.00109	4.00141	5.02195	6.00218	7.0025	8.00294	9.00326	10.0037	11.004	12.0044	13.0048	14.0051	15.0056	16.0059	17.0063	18.0067	19.0071	20.0074	21.0079	22.0082	23.0085	24.009	25.0093	26.0097	27.01	28.0104	29.0108	30.0111	31.0116	32.0119	33.0124	34.0127	35.0131	36.0134	37.0138	38.0142	39.0145	40.015	41.0153	42.0156	43.0161	44.0164	45.0168	46.0172	47.0176	48.0179
	0.0286179	0.00671262	0.00591201	0.00556447	0.00529946	0.00511456	0.00503755	0.00490614	0.0048258	0.00468366	0.00461392	0.00456943	0.00452438	0.0044543	0.00441382	0.00441472	0.00436248	0.00431053	0.00431469	0.00426851	0.00422786	0.0042242	0.00418786	0.00414835	0.00402336	0.00406794	0.00405194	0.00404919	0.00399235	0.00397511	0.00395198	0.00396923	0.00391843	0.00392646	0.00392206	0.00389194	0.00387682	0.00385192	0.00385102	0.00388243	0.00385756	0.00385529	0.00381021	0.00385612	0.00379474	0.0037856	0.00381167	0.00378364	0.00376349
Charge [As]	0	0.0176709	0.00631433	0.00574082	0.0054337	0.00531396	0.0049757	0.00497344	0.00486811	0.00475625	0.00465084	0.00459305	0.00454872	0.00449114	0.00443539	0.00441648	0.00438992	0.00433824	0.00431434	0.00429332	0.00424946	0.00422814	0.00420729	0.00416936	0.0040879	0.00404686	0.00406156	0.00405178	0.00402238	0.00398532	0.00396473	0.00396259	0.00394501	0.00392441	0.00392544	0.00390856	0.00388555	0.00386592	0.00385301	0.00386789	0.00387193	0.00385758	0.0038339	0.00383508	0.00382658	0.00379169	0.00380015	0.00379917	0.0037747
Time [h]	Charge [As]	H2 [mol]	O2 [mol]	Kammer [mol]	Δ Kammer [mol]	H2 [ppm]	Δ H2 [ppm]	O2 [ppm]	Δ O2 [ppm]
0.5	4.87517	2.52638e-05	1.26319e-05	0.0119456	0.000401971	2114.91	71.1671	1057.45	35.5835
1	8.49944	4.40453e-05	2.20226e-05	0.0119737	0.000402424	3678.49	123.63	1839.25	61.8151
1.5	11.6404	6.03223e-05	3.01611e-05	0.0119981	0.000403372	5027.66	169.029	2513.83	84.5143
2	14.4332	7.47946e-05	3.73973e-05	0.0120197	0.000404193	6222.65	209.252	3111.32	104.626
2.5	16.9786	8.79856e-05	4.39928e-05	0.0120395	0.000404923	7308.08	245.792	3654.04	122.896
3	19.3242	0.000100141	5.00704e-05	0.0120577	0.000405588	8305.14	279.363	4152.57	139.681
3.5	21.5142	0.00011149	5.57448e-05	0.0120747	0.000406201	9233.35	310.617	4616.68	155.308
4	23.572	0.000122153	6.10766e-05	0.0120906	0.000406773	10103.1	339.906	5051.56	169.953
4.5	25.5173	0.000132234	6.6117e-05	0.0121057	0.000407311	10923.3	367.526	5461.63	183.763
5	27.3799	0.000141886	7.09431e-05	0.0121202	0.000407819	11706.6	393.904	5853.31	196.952
F	z O2	z H2
96485.3	4	2
Fehler Anfangsmolmenge
Größen	Wert	Fehler_Abs	dn/dx	C*D	E²
Volume [m³]	0.000244	1e-06	48.9022	4.89022e-05	2.39143e-09
R	8.314	Fix	0
T [K]	295.15	1	-4.04274e-05	-4.04274e-05	1.63437e-09
p [Pa]	120000	4000	9.94345e-08	0.000397738	1.58195e-07
n [mol]	0.0119321
Summe	1.62221e-07
f_n (abs)	0.000402767
F_rel	0.0337548
Größen	V/min [ml]
V_12sec [ml]	0.5
ΔV_12sec [ml]	0.1
VGes [ml]	244
Volumensanteil	0.00204918
Δ_Volumensanteil	0.000409836
[truncated: 1,707 more columns]

## Sheet: Error Calculation
Zeit [h]	H2 Haben [ppm]	ΔH2 Haben [ppm]	H2 soll [ppm]	Δ H2 soll [ppm]	Gauß1	Gauß2	Error		Zeit [h]	O2 Haben [ppm]	ΔO2_Haben [ppm]	O2 soll [ppm]	Δ O2 ist [ppm]	Gauß1	Gauß2	Error
0.5	758.033	3.71436	2114.91	71.1671	3.08451e-06	0.000145469	0.0121882		0.5	186.4	5.74079	1057.45	35.5835	2.94728e-05	3.51842e-05	0.00804096
1	2014.96	9.8733	3678.49	123.63	7.20418e-06	0.000338924	0.0186045		1	643.93	13.403	1839.25	61.8151	5.31039e-05	0.000138455	0.0138405
1.5	3241.48	15.8832	5027.66	169.029	9.98037e-06	0.000469833	0.0219046		1.5	1139.73	22.0696	2513.83	84.5143	7.70755e-05	0.000232339	0.0175902
2	4392.65	21.524	6222.65	209.252	1.19645e-05	0.000563496	0.0239888		2	1638.11	30.6934	3111.32	104.626	9.73196e-05	0.000313461	0.0202677
2.5	5335.78	26.1453	7308.08	245.792	1.27992e-05	0.000603	0.0248153		2.5	2102.57	38.7818	3654.04	122.896	0.000112644	0.000374527	0.022072
3	6233.7	30.5451	8305.14	279.363	1.35266e-05	0.00063744	0.025514		3	2496.43	46.3989	4152.57	139.681	0.000124848	0.000408927	0.0231036
3.5	7032.78	34.4606	9233.35	310.617	1.39292e-05	0.000656547	0.0258936		3.5	2890.49	53.2592	4616.68	155.308	0.000133086	0.000443624	0.0240148
4	7772.77	38.0866	10103.1	339.906	1.42112e-05	0.000669956	0.0261566		4	3236.69	59.3463	5051.56	169.953	0.000138018	0.000464683	0.02455
4.5	8487.55	41.589	10923.3	367.526	1.44961e-05	0.000683487	0.0264194		4.5	3559.69	65.1616	5461.63	183.763	0.000142344	0.000480894	0.0249647
5	9123.78	44.7065	11706.6	393.904	1.45841e-05	0.000687708	0.0265008		5	3880.64	71.318	5853.31	196.952	0.000148455	0.000497646	0.0254185

## Sheet: Messwerte 
Entstandene Sauerstoff und Wasserstoffmenge											Messdaten
O2_Mess [ppm]	ΔO2_Mess [ppm]	O2_Back [ppm]	ΔO2_Back [ppm]	O2_Ekt [ppm]	ΔO2_Abs [ppm]	ΔO2_Rel	H2 Ekt [ppm]	ΔH2_Abs [ppm]	ΔH2_Rel		H2	O2	N2
204.049	3.67288	17.6484	4.4121	186.4	5.74079	0.0307981	758.033	3.71436	0.0049		0.912378	0.393733	0.0101948
667.665	12.018	23.7351	5.93377	643.93	13.403	0.0208144	2014.96	9.8733	0.0049		0.848755	0.360797	0.00809284
1166.84	21.0031	27.11	6.7775	1139.73	22.0696	0.0193638	3241.48	15.8832	0.0049		0.777277	0.328399	0.00784599
1664.71	29.9647	26.5942	6.64855	1638.11	30.6934	0.0187371	4392.65	21.524	0.0049		0.703278	0.293929	0.0082218
2127.21	38.2897	24.6341	6.15852	2102.57	38.7818	0.0184449	5335.78	26.1453	0.0049		0.62337	0.254735	0.00875236
2531.44	45.5659	35.0094	8.75236	2496.43	46.3989	0.0185861	6233.7	30.5451	0.0049		0.533578	0.214312	0.00615852
2923.38	52.6208	32.8872	8.2218	2890.49	53.2592	0.0184257	7032.78	34.4606	0.0049		0.439265	0.168062	0.00664855
3268.08	58.8254	31.384	7.84599	3236.69	59.3463	0.0183355	7772.77	38.0866	0.0049		0.324148	0.118275	0.0067775
3592.06	64.6571	32.3714	8.09284	3559.69	65.1616	0.0183054	8487.55	41.589	0.0049		0.201496	0.0683577	0.00593377
3921.42	70.5855	40.7792	10.1948	3880.64	71.318	0.0183779	9123.78	44.7065	0.0049		0.0758033	0.021996	0.0044121
											0	0.00159116	0.00341362

## Sheet: Vergleich
Wasserstoff										Sauerstoff									Wasserstoff zu Sauerstoff Ratio
Zeit [h]	Soll [ppm]	Ist [ppm]	Ratio Mess	Fehler	Ratio Ekt	Fehler	Ratio Ges	Fehler		Soll [ppm]	Ist [ppm]	Ratio Mess	Fehler	Ratio Ekt	Fehler	Ratio Ges	Fehler		Ratio Mess	Fehler	Ratio Ekt	Fehler	Ratio Ges	Fehler
0.5	2114.91	758.033	0.358424	0.0121882	0.567817	0.0110802	0.631232	0.0247482		1057.45	186.4	0.176273	0.00804096	0.344458	0.0139013	0.511741	0.0311681		4.06669	0.23138	3.42432	0.171219	2.37518	0.370168
1	3678.49	2014.96	0.547768	0.0186045	0.918275	0.0138437	0.596518	0.0221665		1839.25	643.93	0.350105	0.0138405	0.731272	0.0149234	0.478762	0.0212996		3.12916	0.163088	2.53732	0.0659304	2.4665	0.283929
1.5	5027.66	3241.48	0.644729	0.0219046	0.993584	0.006	0.648892	0.0223916		2513.83	1139.73	0.453384	0.0175902	0.841492	0.0156013	0.538786	0.0231677		2.84407	0.146671	2.33962	0.0566894	2.43123	0.273184
2	6222.65	4392.65	0.705914	0.0239888	0.993584	0.006	0.710472	0.0245219		3111.32	1638.11	0.5265	0.0202677	0.915091	0.006	0.575352	0.0224673		2.68153	0.137693	2.18454	0.0549119	2.45501	0.278571
2.5	7308.08	5335.78	0.73012	0.0248153	0.993584	0.006	0.734835	0.0253667		3654.04	2102.57	0.57541	0.022072	0.915091	0.006	0.628801	0.0244698		2.53774	0.130059	2.18454	0.05181	2.32336	0.263212
3	8305.14	6233.7	0.750583	0.025514	0.993584	0.006	0.755429	0.0260809		4152.57	2496.43	0.601176	0.0231036	0.915091	0.006	0.656958	0.0256121		2.49705	0.128115	2.18454	0.0555143	2.2861	0.268054
3.5	9233.35	7032.78	0.761671	0.0258936	0.993584	0.006	0.766589	0.0264687		4616.68	2890.49	0.626098	0.0240148	0.915091	0.006	0.684192	0.0266237		2.43307	0.124703	2.18454	0.0541247	2.22754	0.261198
4	10103.1	7772.77	0.769343	0.0261566	0.993584	0.006	0.77431	0.0267375		5051.56	3236.69	0.64073	0.02455	0.915091	0.006	0.700182	0.0272179		2.40145	0.123014	2.18454	0.0566001	2.19859	0.263909
4.5	10923.3	8487.55	0.777016	0.0264194	0.993584	0.006	0.782033	0.0270061		5461.63	3559.69	0.651762	0.0249647	0.915091	0.006	0.712238	0.0276779		2.38435	0.12212	2.18454	0.0573068	2.18293	0.26413
5	11706.6	9123.78	0.779369	0.0265008	0.993584	0.006	0.784402	0.0270893		5853.31	3880.64	0.662981	0.0254185	0.915091	0.006	0.724498	0.0281803		2.3511	0.120484	2.18454	0.056368	2.15249	0.260208
Zeit_1 [h]	Soll [ppm]	Ist [ppm]	Ratio Mess	Fehler	Ratio Ekt	Fehler	Ratio Ges	Fehler		Soll [ppm]	Ist [ppm]	Ratio Mess	Fehler	Ratio Ekt	Fehler	Ratio Ges	Fehler		Ratio Mess	Fehler	Ratio Ekt	Fehler	Ratio Ges	Fehler
1.5	1349.17	1226.52	0.909094	0.0219046	0.993584	0.006	0.914964	0.0227279		674.583	495.801	0.734973	0.0175902	0.841492	0.0156013	0.873417	0.026442		2.47381	0.0840137	2.33962	0.0566894	2.11472	0.237482
2	2544.16	2377.69	0.934571	0.0239888	0.993584	0.006	0.940606	0.0248028		1272.08	994.181	0.781541	0.0202677	0.915091	0.006	0.854059	0.0228453		2.39161	0.0872652	2.18454	0.0549119	2.18957	0.247833
2.5	3629.59	3320.82	0.91493	0.0248153	0.993584	0.006	0.920838	0.0255871		1814.8	1458.64	0.803751	0.022072	0.915091	0.006	0.878329	0.024798		2.27665	0.0878727	2.18454	0.05181	2.08433	0.236443
3	4626.65	4218.74	0.911834	0.025514	0.993584	0.006	0.917722	0.02627		2313.33	1852.5	0.800794	0.0231036	0.915091	0.006	0.875098	0.0258911		2.27732	0.0915277	2.18454	0.0555143	2.08494	0.244959
3.5	5554.86	5017.82	0.90332	0.0258936	0.993584	0.006	0.909153	0.0266328		2777.43	2246.56	0.808863	0.0240148	0.915091	0.006	0.883915	0.0268754		2.23356	0.092177	2.18454	0.0541247	2.04487	0.240387
4	6424.64	5757.81	0.896208	0.0261566	0.993584	0.006	0.901995	0.0268831		3212.32	2592.76	0.807131	0.02455	0.915091	0.006	0.882022	0.0274442		2.22072	0.0936127	2.18454	0.0566001	2.03312	0.244994
4.5	7244.78	6472.6	0.893415	0.0264194	0.993584	0.006	0.899184	0.0271387		3622.39	2915.76	0.804927	0.0249647	0.915091	0.006	0.879614	0.0278841		2.21987	0.095128	2.18454	0.0573068	2.03234	0.246777
5	8028.14	7108.83	0.885489	0.0265008	0.993584	0.006	0.891207	0.0272095		4014.07	3236.71	0.806341	0.0254185	0.915091	0.006	0.88116	0.0283715		2.19631	0.0954675	2.18454	0.056368	2.01078	0.243974
							0.911958	0.0259065								0.875952	0.0263189
Zeit_2 [h]	Soll [ppm]	Ist [ppm]	Ratio Mess	Fehler	Ratio Ekt	Fehler	Ratio Ges	Fehler		Soll [ppm]	Ist [ppm]	Ratio Mess	Fehler	Ratio Ekt	Fehler	Ratio Ges	Fehler		Ratio Mess	Fehler	Ratio Ekt	Fehler	Ratio Ges	Fehler
2.5	1085.44	943.129	0.868893	0.0248153	0.993584	0.006	0.874504	0.0255277		542.719	464.462	0.855806	0.022072	0.915091	0.006	0.935215	0.0248872		2.03058	0.0781398	2.18454	0.05181	1.85905	0.221829
3	2082.5	1841.05	0.884056	0.025514	0.993584	0.006	0.889765	0.0262349		1041.25	858.317	0.824315	0.0231036	0.915091	0.006	0.900801	0.0259289		2.14495	0.0862914	2.18454	0.0555143	1.96375	0.236949
3.5	3010.71	2640.13	0.876912	0.0258936	0.993584	0.006	0.882575	0.0266002		1505.35	1252.38	0.83195	0.0240148	0.915091	0.006	0.909145	0.0269116		2.10809	0.0870499	2.18454	0.0541247	1.93	0.232744
4	3880.48	3380.12	0.871055	0.0261566	0.993584	0.006	0.87668	0.0268525		1940.24	1598.58	0.823908	0.02455	0.915091	0.006	0.900356	0.0274697		2.11445	0.0894484	2.18454	0.0566001	1.93583	0.238458
4.5	4700.62	4094.9	0.87114	0.0264194	0.993584	0.006	0.876766	0.027112		2350.31	1921.58	0.817584	0.0249647	0.915091	0.006	0.893445	0.027903		2.13101	0.0917108	2.18454	0.0573068	1.95099	0.241309
5	5483.98	4731.13	0.862718	0.0265008	0.993584	0.006	0.868289	0.0271824		2741.99	2242.53	0.817846	0.0254185	0.915091	0.006	0.893732	0.0283884		2.10973	0.0921916	2.18454	0.056368	1.93151	0.238669
							0.878815	0.0267964								0.905449	0.0269148						1.92852	0.234993
Jeder MP	Soll [ppm]	Ist [ppm]	Ratio Mess	Fehler	Ratio Ekt	Fehler	Ratio Ges	Fehler		Soll [ppm]	Ist [ppm]	Ratio Mess	Fehler	Ratio Ekt	Fehler	Ratio Ges	Fehler		Ratio Mess	Fehler	Ratio Ekt	Fehler	Ratio Ges	Fehler
0.5	2114.91	758.033	0.358424	0.0121882	0.567817	0.0110802	0.631232	0.0247482		1057.45	186.4	0.176273	0.00804096	0.344458	0.0139013	0.511741	0.0311681		4.06669	0.23138	3.42432	0.171219	2.37518	0.370168
1	1563.59	1256.93	0.803874	0.0186045	0.918275	0.0138437	0.875417	0.0241796		781.793	457.53	0.585231	0.0138405	0.731272	0.0149234	0.800292	0.0249989		2.7472	0.090904	2.53732	0.0659304	2.16543	0.247793
1.5	1349.17	1226.52	0.909094	0.0219046	0.993584	0.006	0.914964	0.0227279		674.583	495.801	0.734973	0.0175902	0.841492	0.0156013	0.873417	0.026442		2.47381	0.0840137	2.33962	0.0566894	2.11472	0.237482
2	1194.99	1151.18	0.963336	0.0239888	0.993584	0.006	0.969556	0.0248434		597.494	498.381	0.834118	0.0202677	0.915091	0.006	0.911514	0.0229405		2.30983	0.0803645	2.18454	0.0549119	2.1147	0.242012
2.5	1085.44	943.129	0.868893	0.0248153	0.993584	0.006	0.874504	0.0255277		542.719	464.462	0.855806	0.022072	0.915091	0.006	0.935215	0.0248872		2.03058	0.0781398	2.18454	0.05181	1.85905	0.221829
3	997.061	897.916	0.900563	0.025514	0.993584	0.006	0.906378	0.0262556		498.53	393.855	0.790032	0.0231036	0.915091	0.006	0.863337	0.0258741		2.27981	0.0928268	2.18454	0.0555143	2.08722	0.245487
3.5	928.209	799.081	0.860885	0.0258936	0.993584	0.006	0.866444	0.0265808		464.105	394.063	0.849081	0.0240148	0.915091	0.006	0.927865	0.026939		2.0278	0.083722	2.18454	0.0541247	1.8565	0.227755
4	869.775	739.989	0.850782	0.0261566	0.993584	0.006	0.856275	0.0268285		434.888	346.2	0.796068	0.02455	0.915091	0.006	0.869933	0.0274276		2.13746	0.0930777	2.18454	0.0566001	1.95689	0.240756
4.5	820.14	714.787	0.871543	0.0264194	0.993584	0.006	0.87717	0.0271124		410.07	322.997	0.787662	0.0249647	0.915091	0.006	0.860748	0.0278588		2.21299	0.0970553	2.18454	0.0573068	2.02604	0.247071
5	783.36	636.23	0.812181	0.0265008	0.993584	0.006	0.817425	0.0271248		391.68	320.951	0.819422	0.0254185	0.915091	0.006	0.895454	0.0283908		1.98233	0.0892468	2.18454	0.056368	1.81487	0.231312
							0.88534	0.0258752								0.894866	0.0263311						1.95932	0.236603
