# Supplementary material for: Degradation of oxynitride based photoanodes
Source: Royal Society of Chemistry journal article supplement (doi:10.1039/d5ta06368j), 2025-12-15
Supplement: d5ta06368j1.zip [file Electrode_4.xlsx]

## Sheet: Sollwerte
Time [s]	0	1.00032	2.00064	3.00109	4.00141	5.02195	6.00218	7.0025	8.00294	9.00326	10.0037	11.004	12.0044	13.0048	14.0051	15.0056	16.0059	17.0063	18.0067	19.0071	20.0074	21.0079	22.0082	23.0085	24.009	25.0093	26.0097	27.01	28.0104	29.0108	30.0111	31.0116	32.0119	33.0124	34.0127	35.0131	36.0134	37.0138	38.0142	39.0145	40.015	41.0153	42.0156	43.0161	44.0164	45.0168	46.0172	47.0176	48.0179
	0.0206839	0.00408856	0.00371455	0.00353011	0.00341804	0.00334635	0.00327863	0.00324424	0.00316384	0.00305596	0.0030256	0.00286086	0.00284672	0.00280292	0.00278865	0.00278537	0.002758	0.00274508	0.00273496	0.00273438	0.00270681	0.00269203	0.00269024	0.00266285	0.00265744	0.00265684	0.00263091	0.00262995	0.00263713	0.00261601	0.00262613	0.0025971	0.0025899	0.00260493	0.0025775	0.00258053	0.00256793	0.0025583	0.00255536	0.00255782	0.00254167	0.00253855	0.00252938	0.00252879	0.00251662	0.0025196	0.00251288	0.00250002	0.00249925
Charge [As]	0	0.0123902	0.0039028	0.00362396	0.00347519	0.00345167	0.003247	0.00326248	0.00320545	0.0031109	0.00304212	0.00294411	0.00285493	0.00282595	0.00279662	0.0027884	0.00277252	0.00275264	0.00274112	0.00273576	0.00272141	0.00270077	0.00269194	0.00267735	0.00266148	0.00265794	0.00264493	0.00263122	0.00263459	0.00262762	0.00262186	0.00261292	0.00259428	0.00259871	0.00259199	0.00258005	0.002575	0.00256414	0.00255785	0.00255736	0.00255102	0.00254087	0.00253473	0.00253035	0.00252346	0.00251912	0.00251725	0.00250745	0.00250038
Time [h]	Charge [As]	H2 [mol]	O2 [mol]	Kammer [mol]	Δ Kammer [mol]	H2 [ppm]	Δ H2 [ppm]	O2 [ppm]	Δ O2 [ppm]
0.5	3.37229	1.74757e-05	8.73783e-06	0.0119339	0.000401971	1464.37	49.3246	732.186	24.6623
1	5.92481	3.07032e-05	1.53516e-05	0.0119537	0.000402031	2568.5	86.3843	1284.25	43.1922
1.5	8.13377	4.21503e-05	2.10751e-05	0.0119709	0.000402699	3521.07	118.449	1760.54	59.2243
2	10.1379	5.25358e-05	2.62679e-05	0.0119864	0.000403276	4382.94	147.462	2191.47	73.7309
2.5	12.0124	6.22498e-05	3.11249e-05	0.012001	0.0004038	5187.08	174.531	2593.54	87.2656
3	13.7639	7.13263e-05	3.56632e-05	0.0120145	0.00040429	5936.67	199.769	2968.34	99.8846
3.5	15.4273	7.99463e-05	3.99732e-05	0.0120274	0.000404747	6647	223.685	3323.5	111.842
4	16.9984	8.80879e-05	4.4044e-05	0.0120396	0.000405182	7316.5	246.23	3658.25	123.115
4.5	18.5078	9.591e-05	4.7955e-05	0.0120513	0.000405592	7958.46	267.845	3979.23	133.923
5	19.9516	0.000103392	5.1696e-05	0.0120625	0.000405987	8571.33	288.484	4285.67	144.242
F	z O2	z H2
96485.3	4	2
Fehler Anfangsmolmenge
Größen	Wert	Fehler_Abs	dn/dx	C*D	E²
Volume [m³]	0.000244	1e-06	48.9022	4.89022e-05	2.39143e-09
R	8.314	Fix	0
T [K]	295.15	1	-4.04274e-05	-4.04274e-05	1.63437e-09
p [Pa]	120000	4000	9.94345e-08	0.000397738	1.58195e-07
n [mol]	0.0119321
Summe	1.62221e-07
f_n (abs)	0.000402767
F_rel	0.0337548
Größen	V/min [ml]
V_12sec [ml]	0.5
ΔV_12sec [ml]	0.1
VGes [ml]	244
Volumensanteil	0.00204918
Δ_Volumensanteil	0.000409836
[truncated: 1,707 more columns]

## Sheet: Error Calculation
Zeit [h]	H2 Haben [ppm]	ΔH2 Haben [ppm]	H2 soll [ppm]	Δ H2 soll [ppm]	Gauß1	Gauß2	Error		Zeit [h]	O2 Haben [ppm]	ΔO2_Haben [ppm]	O2 soll [ppm]	Δ O2 ist [ppm]	Gauß1	Gauß2	Error
0.5	509.358	2.49586	1464.37	49.3246	2.90494e-06	0.000137268	0.0118395		0.5	146.803	39.2994	732.186	24.6623	0.00288091	4.56092e-05	0.0540974
1	1385.09	6.78694	2568.5	86.3843	6.98215e-06	0.000328934	0.018328		1	459.332	60.1854	1284.25	43.1922	0.00219626	0.000144699	0.0483835
1.5	2231.46	10.9342	3521.07	118.449	9.64321e-06	0.000454506	0.0215441		1.5	818.806	71.3686	1760.54	59.2243	0.00164333	0.000244784	0.0434524
2	3035.81	14.8755	4382.94	147.462	1.15189e-05	0.000543056	0.0235494		2	1158.06	83.1253	2191.47	73.7309	0.00143878	0.000316096	0.0418913
2.5	3748.84	18.3693	5187.08	174.531	1.25412e-05	0.000591355	0.0245743		2.5	1501.45	84.9131	2593.54	87.2656	0.00107192	0.000379434	0.0380967
3	4390.72	21.5145	5936.67	199.769	1.31334e-05	0.00061938	0.0251498		3	1805.6	88.5221	2968.34	99.8846	0.00088936	0.000418975	0.0361709
3.5	5003.26	24.516	6647	223.685	1.36034e-05	0.000641619	0.0255973		3.5	2079.78	91.05	3323.5	111.842	0.000750531	0.00044347	0.0345543
4	5546.64	27.1785	7316.5	246.23	1.37989e-05	0.000650919	0.0257821		4	2343.69	92.8723	3658.25	123.115	0.000644504	0.000464868	0.0333072
4.5	6086.64	29.8245	7958.46	267.845	1.4044e-05	0.000662532	0.0260111		4.5	2576.11	96.3352	3979.23	133.923	0.000586101	0.000474723	0.0325703
5	6667.72	32.6718	8571.33	288.484	1.45295e-05	0.000685495	0.026458		5	2893.3	99.1762	4285.67	144.242	0.000535523	0.000516293	0.0324317

## Sheet: Messwerte 
Entstandene Sauerstoff und Wasserstoffmenge											Messdaten
O2_Mess [ppm]	ΔO2_Mess [ppm]	O2_Back [ppm]	ΔO2_Back [ppm]	O2_Ekt [ppm]	ΔO2_Abs [ppm]	ΔO2_Rel	H2 Ekt [ppm]	ΔH2_Abs [ppm]	ΔH2_Rel		H2	O2	N2
302.485	5.44472	155.682	38.9204	146.803	39.2994	0.267702	509.358	2.49586	0.0049		0.666772	0.324277	0.080536
694.818	12.5067	235.486	58.8716	459.332	60.1854	0.131028	1385.09	6.78694	0.0049		0.608664	0.292731	0.0809671
1093.21	19.6779	274.409	68.6022	818.806	71.3686	0.0871618	2231.46	10.9342	0.0049		0.554664	0.268926	0.0795578
1473.19	26.5175	315.129	78.7823	1158.06	83.1253	0.0717796	3035.81	14.8755	0.0049		0.500326	0.242769	0.0801455
1814.96	32.6692	313.508	78.377	1501.45	84.9131	0.0565541	3748.84	18.3693	0.0049		0.439072	0.215226	0.0798323
2124.93	38.2487	319.329	79.8323	1805.6	88.5221	0.0490264	4390.72	21.5145	0.0049		0.374884	0.184229	0.078377
2400.36	43.2065	320.582	80.1455	2079.78	91.05	0.0437787	5003.26	24.516	0.0049		0.303581	0.150053	0.0787823
2661.93	47.9147	318.231	79.5578	2343.69	92.8723	0.0396264	5546.64	27.1785	0.0049		0.223146	0.112055	0.0686022
2899.98	52.1996	323.868	80.9671	2576.11	96.3352	0.0373956	6086.64	29.8245	0.0049		0.138509	0.0722151	0.0588716
3215.44	57.8779	322.144	80.5361	2893.3	99.1762	0.0342779	6667.72	32.6718	0.0049		0.0509358	0.0329818	0.0389204
											0	0.00273332	0.00500714

## Sheet: Vergleich
Wasserstoff										Sauerstoff									Wasserstoff zu Sauerstoff Ratio
Zeit [h]	Soll [ppm]	Ist [ppm]	Ratio Mess	Fehler	Ratio Ekt	Fehler	Ratio Ges	Fehler		Soll [ppm]	Ist [ppm]	Ratio Mess	Fehler	Ratio Ekt	Fehler	Ratio Ges	Fehler		Ratio Mess	Fehler	Ratio Ekt	Fehler	Ratio Ges	Fehler
0.5	1464.37	509.358	0.347834	0.0118395	0.567817	0.0110802	0.612582	0.0240344		732.186	146.803	0.2005	0.0540974	0.344458	0.0139013	0.582073	0.158798		3.46968	0.943584	3.42432	0.171219	2.02649	0.636433
1	2568.5	1385.09	0.53926	0.018328	0.918275	0.0138437	0.587253	0.0218346		1284.25	459.332	0.357665	0.0483835	0.731272	0.0149234	0.4891	0.0669121		3.01545	0.420594	2.53732	0.0659304	2.37687	0.414331
1.5	3521.07	2231.46	0.633745	0.0215441	0.993584	0.006	0.637837	0.0220227		1760.54	818.806	0.465089	0.0434524	0.841492	0.0156013	0.552696	0.0526443		2.72526	0.270948	2.33962	0.0566894	2.32967	0.331805
2	4382.94	3035.81	0.692642	0.0235494	0.993584	0.006	0.697115	0.0240724		2191.47	1158.06	0.528441	0.0418913	0.915091	0.006	0.577474	0.0459346		2.62146	0.226118	2.18454	0.0549119	2.4	0.321222
2.5	5187.08	3748.84	0.722726	0.0245743	0.993584	0.006	0.727393	0.02512		2593.54	1501.45	0.578919	0.0380967	0.915091	0.006	0.632636	0.0418377		2.49681	0.184944	2.18454	0.05181	2.28589	0.287894
3	5936.67	4390.72	0.739593	0.0251498	0.993584	0.006	0.744369	0.0257082		2968.34	1805.6	0.608287	0.0361709	0.915091	0.006	0.664729	0.0397667		2.43172	0.166573	2.18454	0.0555143	2.2263	0.282546
3.5	6647	5003.26	0.75271	0.0255973	0.993584	0.006	0.757571	0.0261656		3323.5	2079.78	0.62578	0.0345543	0.915091	0.006	0.683844	0.0380258		2.40567	0.156007	2.18454	0.0541247	2.20245	0.273803
4	7316.5	5546.64	0.7581	0.0257821	0.993584	0.006	0.762995	0.0263545		3658.25	2343.69	0.64066	0.0333072	0.915091	0.006	0.700105	0.036686		2.36662	0.147025	2.18454	0.0566001	2.1667	0.2725
4.5	7958.46	6086.64	0.764801	0.0260111	0.993584	0.006	0.76974	0.0265885		3979.23	2576.11	0.647389	0.0325703	0.915091	0.006	0.707459	0.0358934		2.36273	0.143482	2.18454	0.0573068	2.16313	0.272031
5	8571.33	6667.72	0.777909	0.026458	0.993584	0.006	0.782932	0.0270453		4285.67	2893.3	0.67511	0.0324317	0.915091	0.006	0.737752	0.0357695		2.30454	0.135646	2.18454	0.056368	2.10986	0.264317
Zeit_1 [h]	Soll [ppm]	Ist [ppm]	Ratio Mess	Fehler	Ratio Ekt	Fehler	Ratio Ges	Fehler		Soll [ppm]	Ist [ppm]	Ratio Mess	Fehler	Ratio Ekt	Fehler	Ratio Ges	Fehler		Ratio Mess	Fehler	Ratio Ekt	Fehler	Ratio Ges	Fehler
1.5	952.573	846.373	0.888512	0.0215441	0.993584	0.006	0.894249	0.0223456		476.287	359.474	0.754744	0.0434524	0.841492	0.0156013	0.896911	0.0542488		2.35447	0.147084	2.33962	0.0566894	2.0127	0.25412
2	1814.45	1650.72	0.909767	0.0235494	0.993584	0.006	0.915641	0.0243379		907.223	698.732	0.770188	0.0418913	0.915091	0.006	0.841651	0.0461097		2.36246	0.142306	2.18454	0.0549119	2.16288	0.267098
2.5	2618.58	2363.75	0.902683	0.0245743	0.993584	0.006	0.908512	0.0253342		1309.29	1042.12	0.795941	0.0380967	0.915091	0.006	0.869795	0.0420204		2.26822	0.124897	2.18454	0.05181	2.0766	0.24965
3	3368.17	3005.63	0.892363	0.0251498	0.993584	0.006	0.898125	0.0258867		1684.09	1346.27	0.799406	0.0361709	0.915091	0.006	0.873581	0.03994		2.23256	0.119011	2.18454	0.0555143	2.04396	0.252613
3.5	4078.5	3618.17	0.887134	0.0255973	0.993584	0.006	0.892862	0.0263208		2039.25	1620.45	0.794629	0.0345543	0.915091	0.006	0.86836	0.0381874		2.23283	0.116525	2.18454	0.0541247	2.0442	0.249055
4	4748	4161.55	0.876484	0.0257821	0.993584	0.006	0.882144	0.0264898		2374	1884.36	0.79375	0.0333072	0.915091	0.006	0.8674	0.0368394		2.20846	0.113173	2.18454	0.0566001	2.0219	0.25124
4.5	5389.96	4701.55	0.872279	0.0260111	0.993584	0.006	0.877912	0.0267104		2694.98	2116.78	0.785452	0.0325703	0.915091	0.006	0.858332	0.0360346		2.22109	0.113443	2.18454	0.0573068	2.03346	0.25324
5	6002.84	5282.63	0.880022	0.026458	0.993584	0.006	0.885705	0.0271607		3001.42	2433.96	0.810938	0.0324317	0.915091	0.006	0.886183	0.0359141		2.17038	0.108591	2.18454	0.056368	1.98703	0.247297
							0.894394	0.0255732								0.870277	0.0411618
Zeit_2 [h]	Soll [ppm]	Ist [ppm]	Ratio Mess	Fehler	Ratio Ekt	Fehler	Ratio Ges	Fehler		Soll [ppm]	Ist [ppm]	Ratio Mess	Fehler	Ratio Ekt	Fehler	Ratio Ges	Fehler		Ratio Mess	Fehler	Ratio Ekt	Fehler	Ratio Ges	Fehler
2.5	804.13	713.023	0.8867	0.0245743	0.993584	0.006	0.892426	0.0253133		402.065	343.385	0.854053	0.0380967	0.915091	0.006	0.933298	0.0420789		2.07645	0.109046	2.18454	0.05181	1.90104	0.234634
3	1553.73	1354.91	0.872039	0.0251498	0.993584	0.006	0.87767	0.0258611		776.863	647.537	0.833528	0.0361709	0.915091	0.006	0.910869	0.0399758		2.0924	0.109024	2.18454	0.0555143	1.91564	0.242165
3.5	2264.05	1967.45	0.868995	0.0255973	0.993584	0.006	0.874606	0.0262984		1132.03	921.714	0.814216	0.0345543	0.915091	0.006	0.889765	0.0382085		2.13456	0.11027	2.18454	0.0541247	1.95424	0.242096
4	2933.56	2510.83	0.855898	0.0257821	0.993584	0.006	0.861425	0.0264649		1466.78	1185.63	0.808323	0.0333072	0.915091	0.006	0.883325	0.0368556		2.11771	0.108092	2.18454	0.0566001	1.93882	0.245003
4.5	3575.51	3050.83	0.853256	0.0260111	0.993584	0.006	0.858765	0.0266877		1787.76	1418.05	0.793198	0.0325703	0.915091	0.006	0.866797	0.0360433		2.15143	0.110026	2.18454	0.0573068	1.96968	0.248631
5	4188.39	3631.9	0.867136	0.026458	0.993584	0.006	0.872736	0.0271453		2094.19	1735.23	0.828592	0.0324317	0.915091	0.006	0.905475	0.0359348		2.09304	0.103874	2.18454	0.056368	1.91622	0.241844
							0.86904	0.0264915								0.898255	0.0381828						1.93261	0.242395
Jeder MP	Soll [ppm]	Ist [ppm]	Ratio Mess	Fehler	Ratio Ekt	Fehler	Ratio Ges	Fehler		Soll [ppm]	Ist [ppm]	Ratio Mess	Fehler	Ratio Ekt	Fehler	Ratio Ges	Fehler		Ratio Mess	Fehler	Ratio Ekt	Fehler	Ratio Ges	Fehler
0.5	1464.37	509.358	0.347834	0.0118395	0.567817	0.0110802	0.612582	0.0240344		732.186	146.803	0.2005	0.0540974	0.344458	0.0139013	0.582073	0.158798		3.46968	0.943584	3.42432	0.171219	2.02649	0.636433
1	1104.13	875.731	0.793143	0.018328	0.918275	0.0138437	0.863731	0.0238312		552.064	312.529	0.56611	0.0483835	0.731272	0.0149234	0.774144	0.0680234		2.80208	0.248083	2.53732	0.0659304	2.20869	0.309241
1.5	952.573	846.373	0.888512	0.0215441	0.993584	0.006	0.894249	0.0223456		476.287	359.474	0.754744	0.0434524	0.841492	0.0156013	0.896911	0.0542488		2.35447	0.147084	2.33962	0.0566894	2.0127	0.25412
2	861.873	804.35	0.933258	0.0235494	0.993584	0.006	0.939284	0.0243707		430.936	339.258	0.787257	0.0418913	0.915091	0.006	0.860304	0.0461245		2.37091	0.139627	2.18454	0.0549119	2.17063	0.266276
2.5	804.13	713.023	0.8867	0.0245743	0.993584	0.006	0.892426	0.0253133		402.065	343.385	0.854053	0.0380967	0.915091	0.006	0.933298	0.0420789		2.07645	0.109046	2.18454	0.05181	1.90104	0.234634
3	749.595	641.886	0.856311	0.0251498	0.993584	0.006	0.86184	0.0258417		374.797	304.152	0.81151	0.0361709	0.915091	0.006	0.886808	0.0399525		2.11041	0.112651	2.18454	0.0555143	1.93213	0.244411
3.5	710.327	612.542	0.862337	0.0255973	0.993584	0.006	0.867906	0.0262903		355.164	274.177	0.771974	0.0345543	0.915091	0.006	0.843604	0.0381635		2.23411	0.119992	2.18454	0.0541247	2.04538	0.250489
4	669.505	543.376	0.811609	0.0257821	0.993584	0.006	0.81685	0.0264133		334.753	263.917	0.788395	0.0333072	0.915091	0.006	0.861548	0.0368335		2.05889	0.108828	2.18454	0.0566001	1.88496	0.242415
4.5	641.956	540	0.84118	0.0260111	0.993584	0.006	0.846612	0.0266736		320.978	232.414	0.724082	0.0325703	0.915091	0.006	0.791268	0.0359685		2.32344	0.126825	2.18454	0.0573068	2.12716	0.263217
5	612.875	581.077	0.948117	0.026458	0.993584	0.006	0.954239	0.0272452		306.437	317.187	1.03508	0.0324317	0.915091	0.006	1.13112	0.0362086		1.83197	0.0768656	2.18454	0.056368	1.67721	0.219612
							0.884176	0.0255617								0.901136	0.0393329						1.96264	0.245865
