# Supplementary material for: Degradation of oxynitride based photoanodes
Source: Royal Society of Chemistry journal article supplement (doi:10.1039/d5ta06368j), 2025-12-15
Supplement: d5ta06368j2.pdf [file d5ta06368j2.pdf]

## Supporting Information

### Degradation of Oxynitride Based Photoanodes

*Julian Hörndl, Jakub Zalesak, Franky E. Bedoya-Lora, Sophia Haussener, and Simone Pokrant\**

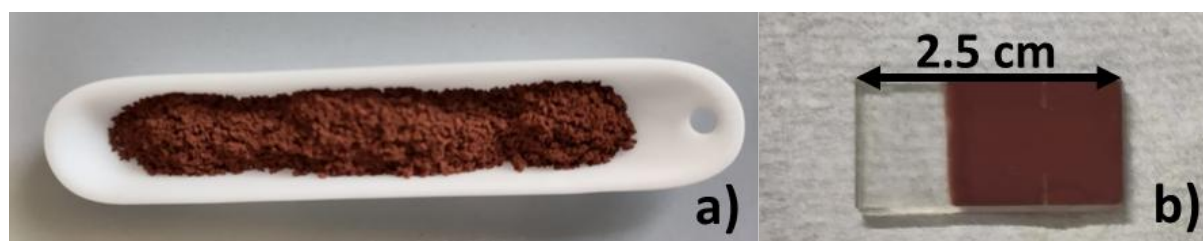

Figure S1: a) LTON powder and b) LTON based photoanode.

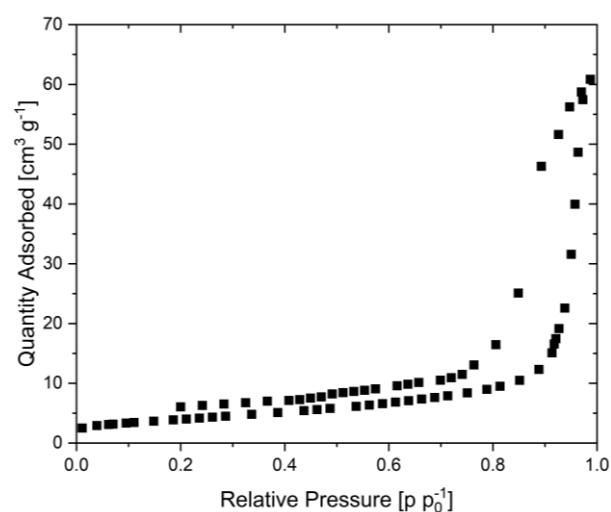

Figure S2: N<sub>2</sub>-Sorption measurement of LTON Powder, carried out with a Micromeritics ASAP 2040 Surface Area and Porosity Analyser. For the measurements liquid nitrogen with a temperature of 77 K was used. Before the measurements the powder was degassed for 2 h at 150 °C. The obtained BET Surface area is 14.2 g m<sup>-2</sup>.

Table S1: Direct band gaps of LTON powder, LTON\_bare and LTON\_cocats photoanodes before and after stability testing.

| Sample                                         | Direct band Gap [eV] |
|------------------------------------------------|----------------------|
| LTON - Powder                                  | 2.11 ± 0.05          |
| LTON_bare photoanode pristine                  | 2.11 ± 0.05          |
| LTON_bare photoanode after stability testing   | 2.11 ± 0.05          |
| LTON_cocats photoanode pristine                | 2.08 ± 0.05          |
| LTON_cocats photoanode after stability testing | 2.09 ± 0.05          |

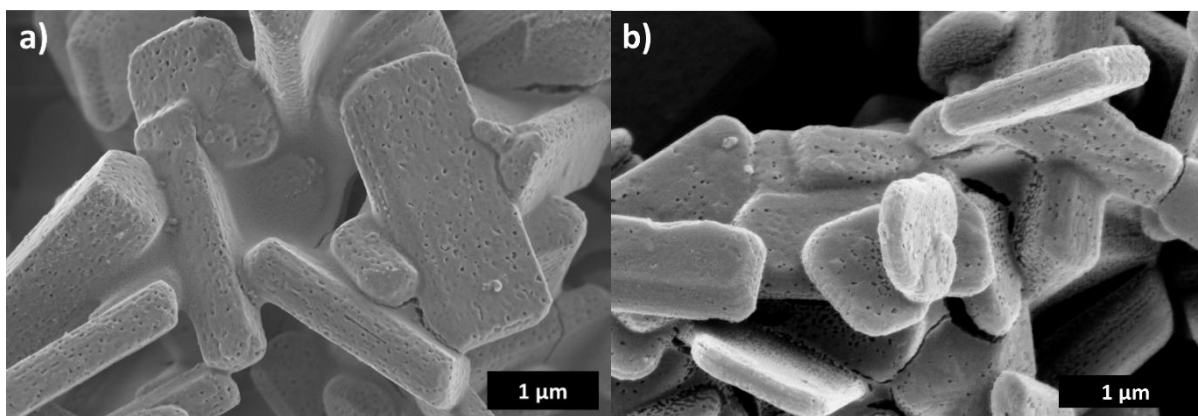

Figure S3: SEM images of (a) pristine LTON\_cocats photoanodes and (b) pristine LTON\_bare photoanodes (scale bars: 1  $\mu\text{m}$ ). The matrix-like structure between the LTON particles is attributed to TiO<sub>2</sub> necking.

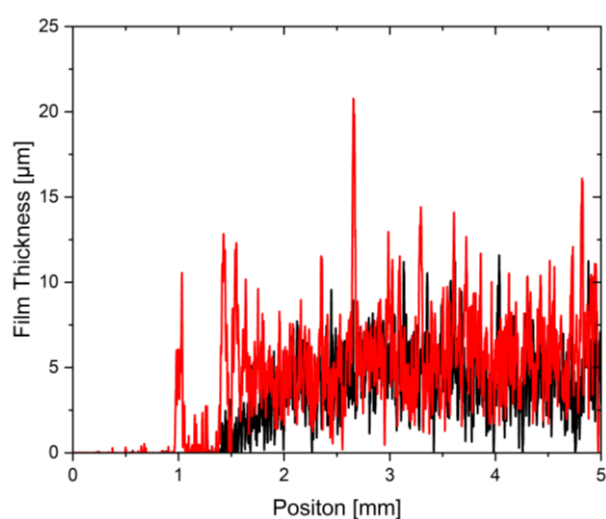

Figure S4: Thickness of the LTON particle film on top of the FTO substrate for two representative photoanodes. For each photoanode three profilometry measurements were performed and the average values were calculated at each position. Then the electrode thickness was obtained by averaging the thickness between the positions 2 mm and 5 mm.

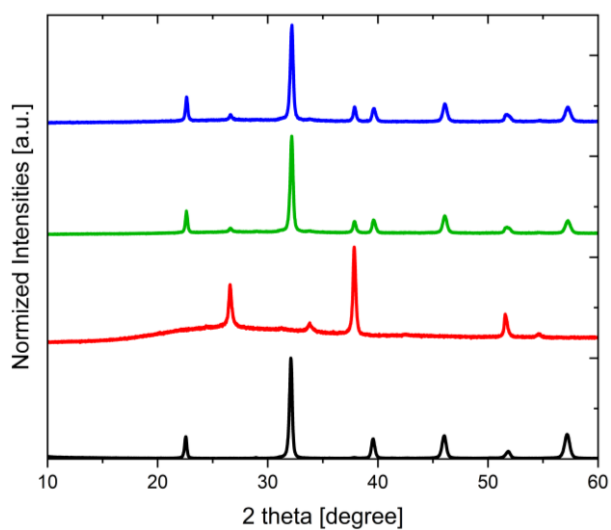

Figure S5: XRD patterns of LTON powder (black), a bare substrate (red), a pristine LTON based photoanode (green) and a LTON based photoanode after stability testing (blue).

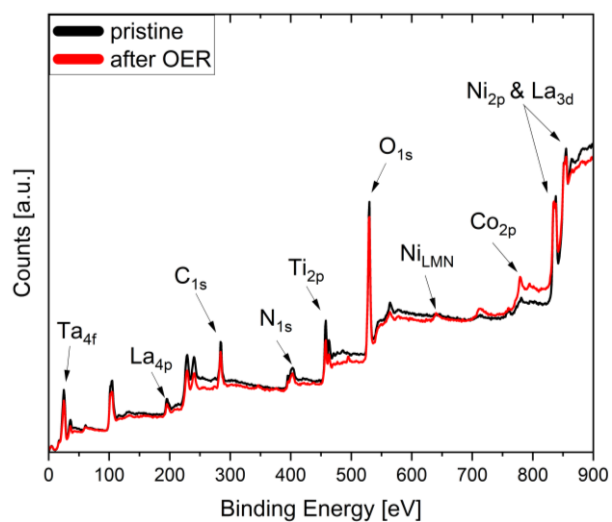

Figure S6: XPS spectra of a pristine LTON\_cocats photoanode and a LTON\_cocats photoanode after 7 h OER.

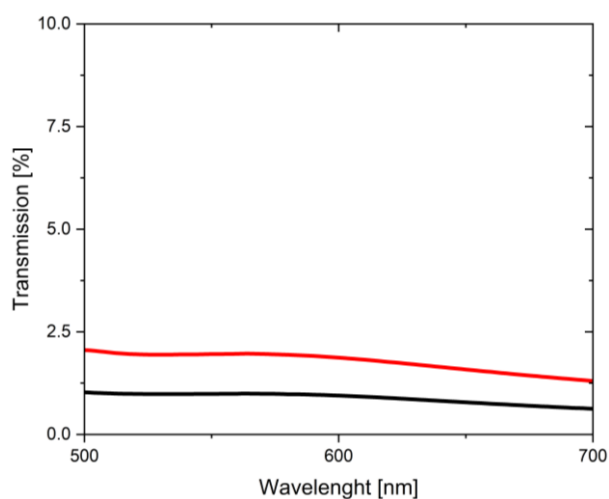

Figure S7: UV-VIS transmission spectra of LTON\_bare (red) and LTON\_cocats (black) photoanodes.

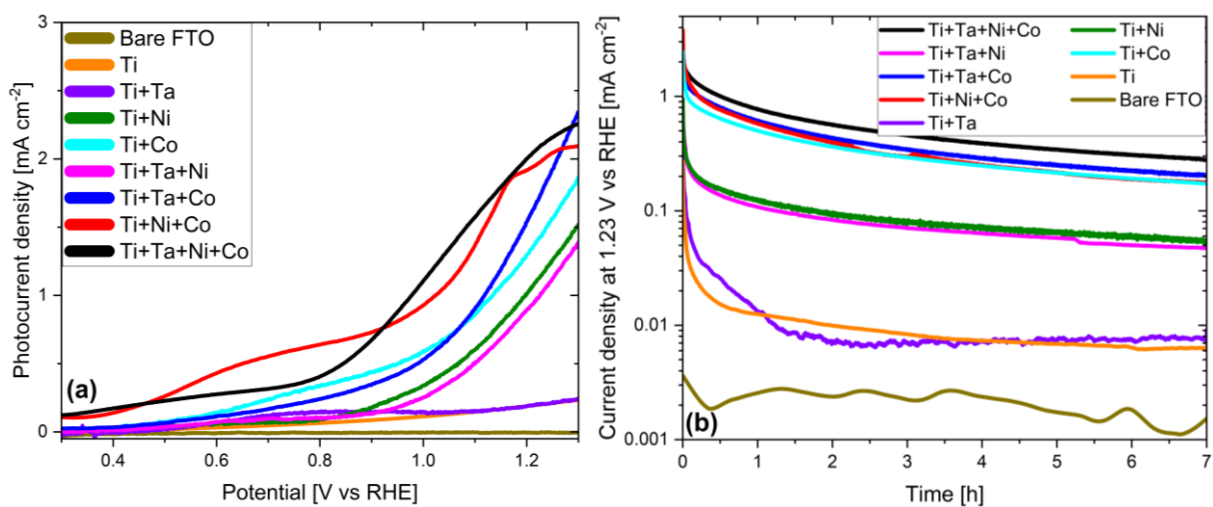

Figure S8: a) Photocurrent densities and b) chronoamperometries of LTON based photoanodes with different combinations of overlayers and of bare FTO substrates.

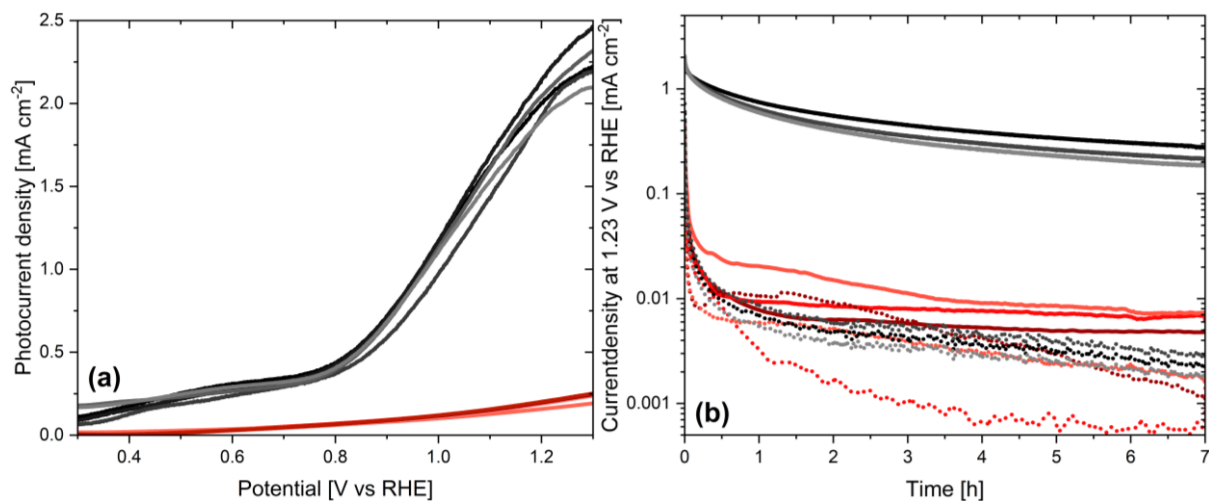

Figure S9: a) Photo current densities of five LTON\_bare (red) and five LTON\_cocats (black) photoanodes as a function of the applied bias potential. b) Current densities at 1.23 V vs RHE of three LTON\_bare (red) and three LTON\_cocats (black) photoanodes with illumination. The corresponding chronoamperometries without illumination are shown as dotted line.

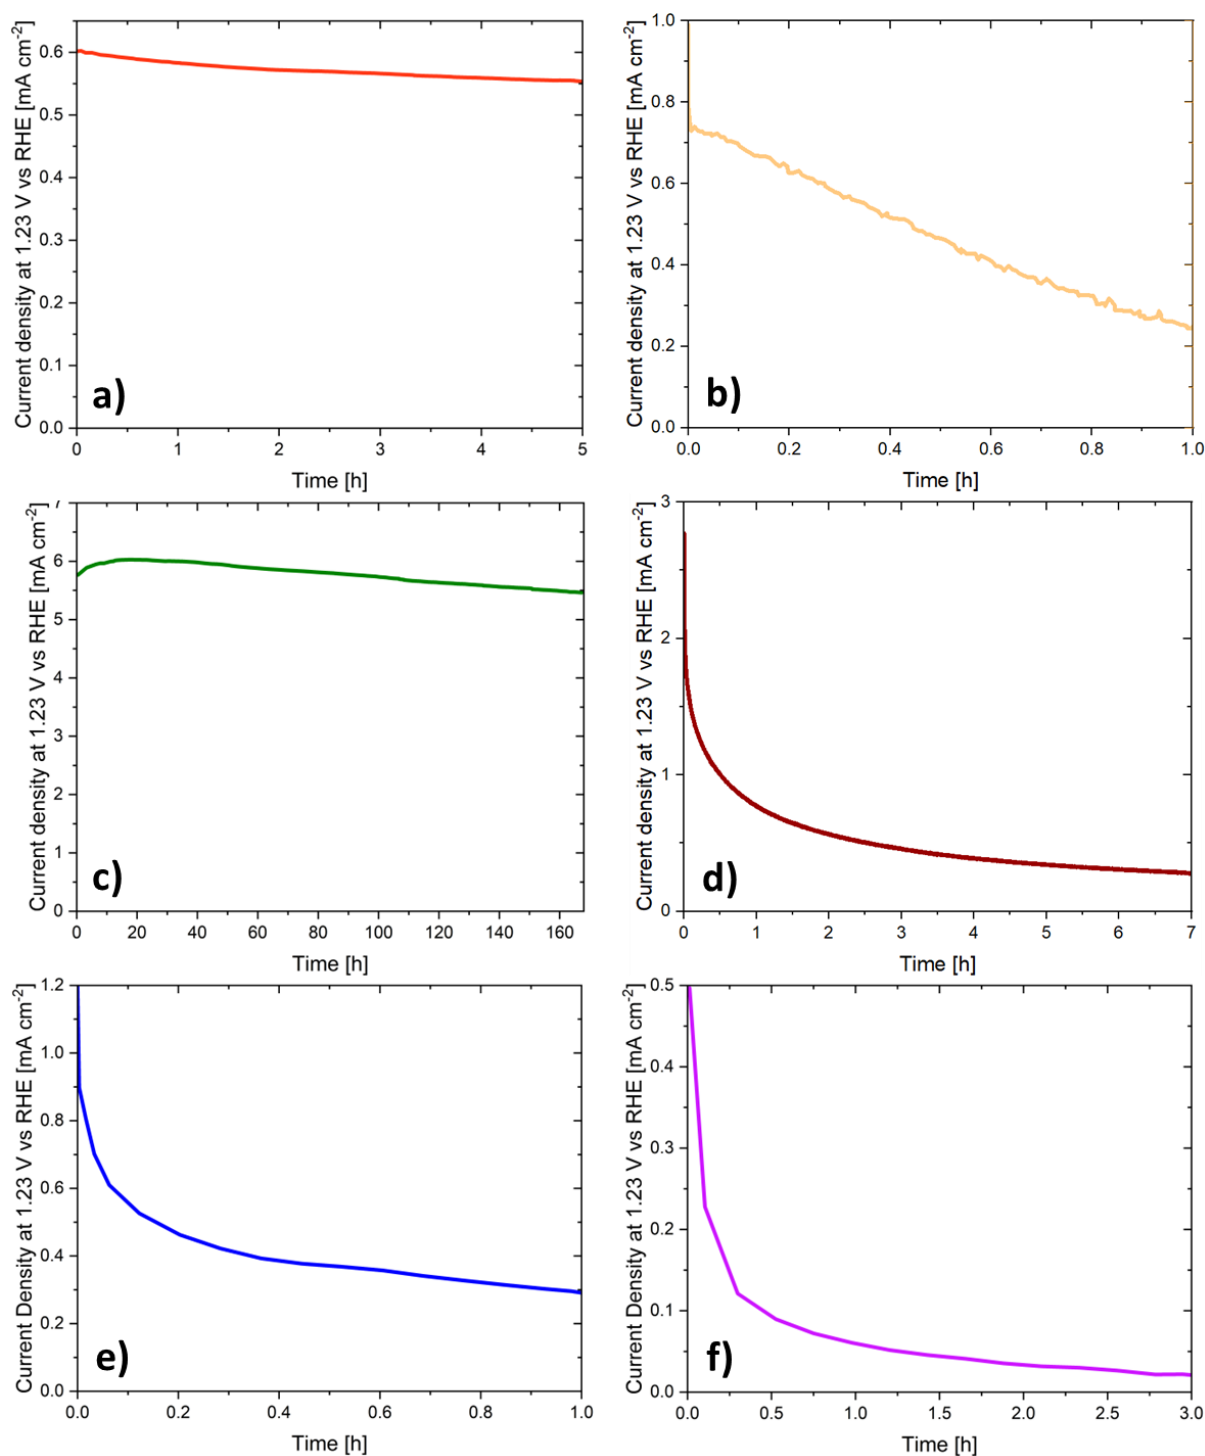

Figure S10: Current densities at 1.23 V vs RHE under 1 sun illumination obtained with a)  $\text{Fe}_2\text{O}_3$ , Reproduced under terms of the CC-BY license.<sup>1</sup> Copyright 2025, V. Benavente Llorente, K.J. Jenewein, M. Bierling, A. Körner, A. Hutzler, A. Kormányos, S. Cherevko, published by American Chemical Society b)  $\text{BiVO}_4$  Reproduced under terms of the CC-BY license.<sup>2</sup> Copyright 2025, F. M. Toma, J.K. Jason, V. Kunzelman, M.T. McDowell, J. Yu, D.M. Larson, N.J. Borys, C. Abelyan, J.W. Beeman, K. M. Yu, J. Yang, C. Le, M. R. Shaner, J. Spurgeon, F.A. Houle, K.A. Persson, I. D. Sharp, published by American Chemical Society. c)  $\text{BiVO}_4 + \text{FeOOH}/\text{NiOOH}$ , Reproduced under terms of the CC-BY license.<sup>3</sup> Copyright 2025, Z. Zhu, M. Daboczi, M. Chen, Y. Xuan, X. Liu, S. Eslava, published by American Chemical Society, d)  $\text{LaTiO}_2\text{N} + \text{NiO}_x/\text{CoO}_x$  (this work) based photoanode, e)  $\text{SrTaO}_2\text{N}/\text{CoPi}$  reproduced with permission.<sup>4</sup> Copyright 2025, Wiley and f)  $\text{Ta}_3\text{N}_5$ , reproduced with permission.<sup>5</sup> Copyright 2025, Elsevier.

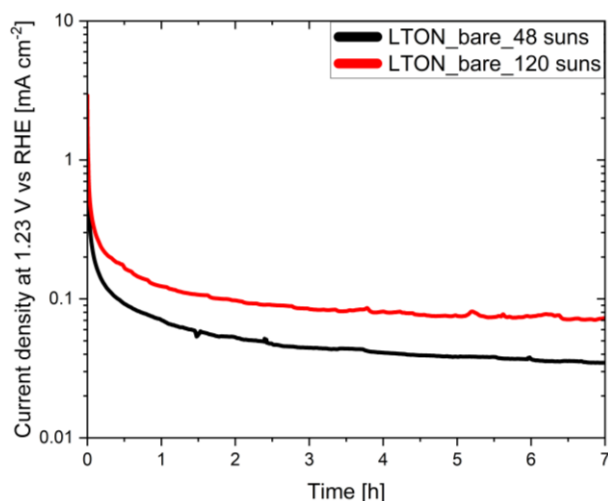

Figure S11: Chronoamperometries of LTON\_bare photoanodes under illumination intensities of 48 and 120 suns.

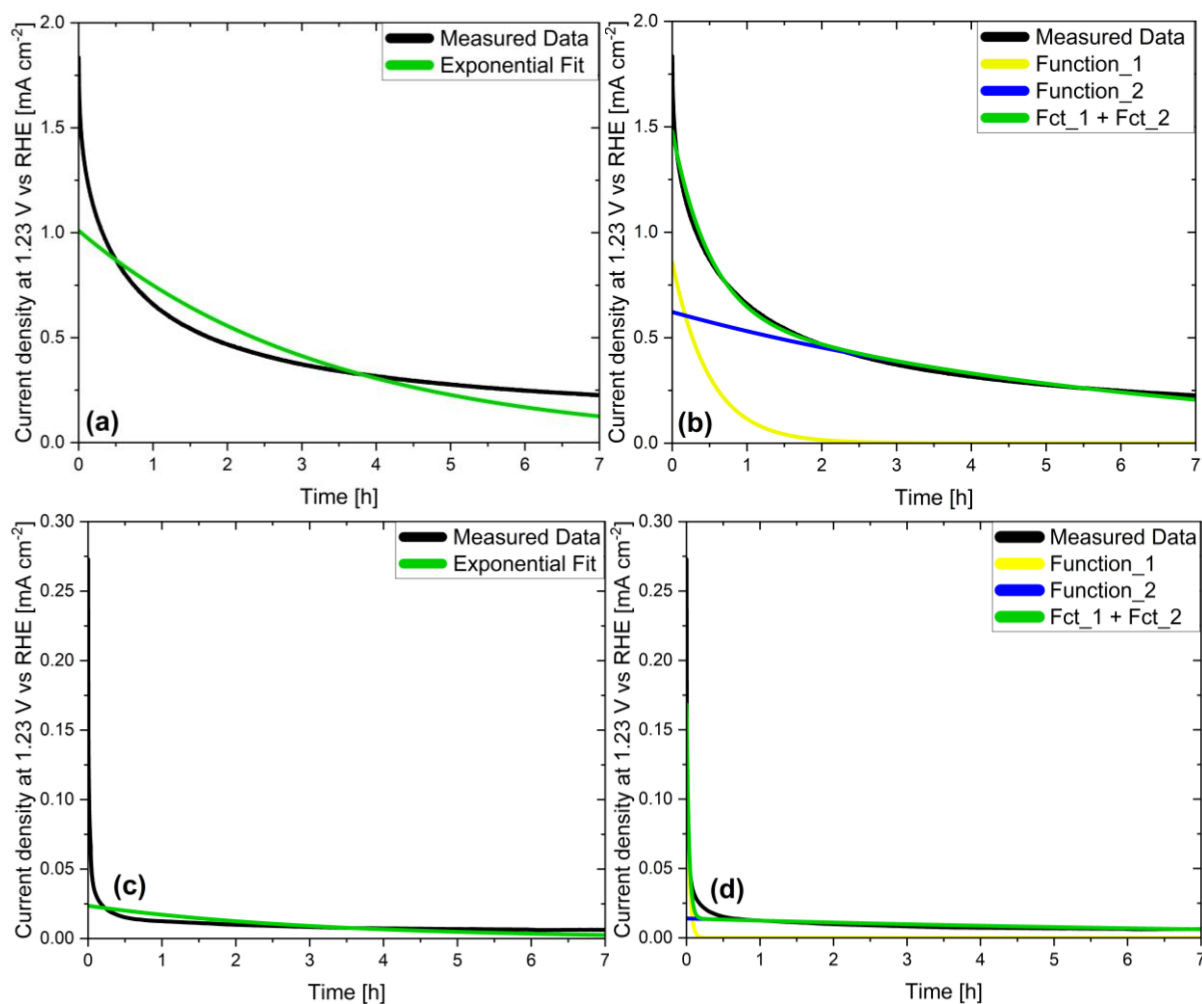

Figure S12: Fitting of the chronoamperometry obtained from LTON\_cocats (a) and (b) and LTON\_bare (c) and (d) photoanodes under 1 sun illumination with a decay function consisting of (a) and (c) one or (b) and (d) two exponential terms (Y-Axis with a linear scale).

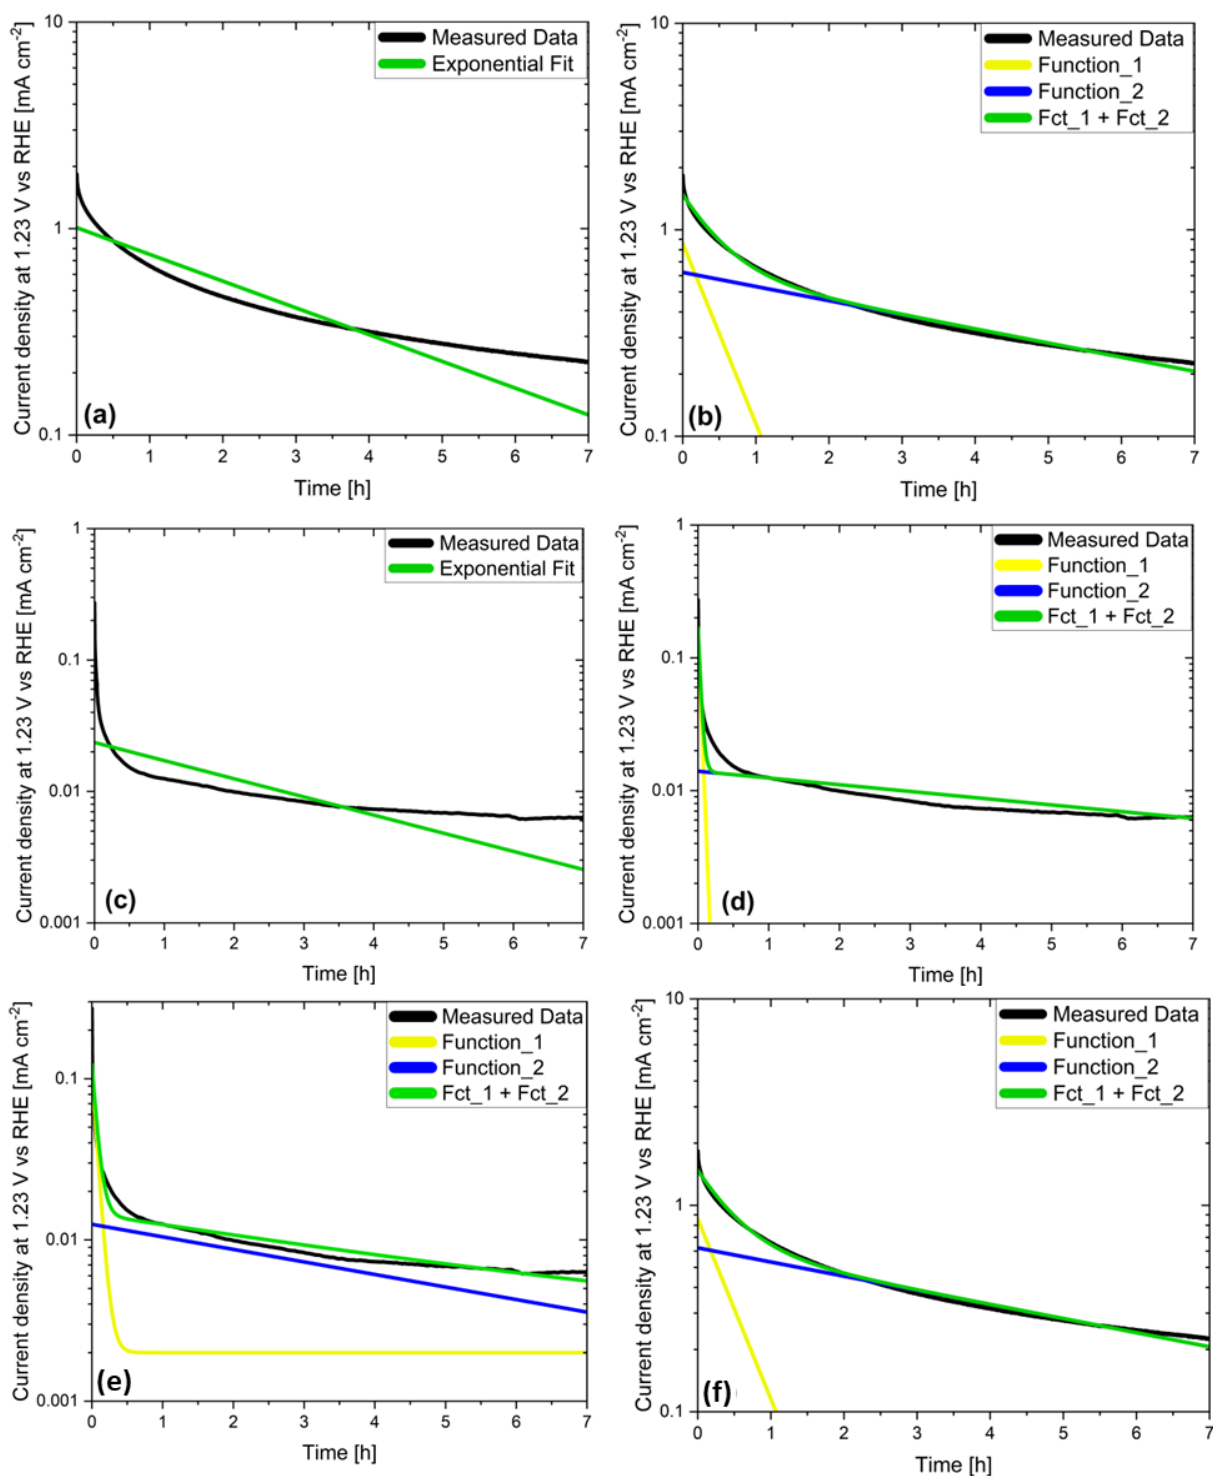

Figure S13: Fitting of the chronoamperometry obtained from LTON\_cocats (a), (b) and (e) and LTON\_bare (c), (d) and (f) photoanodes under 1 sun illumination with a decay function consisting of (a) and (c) one or (b) and (d) two exponential terms (Y-Axis with an exponential scale). For (e) and (f) the two exponential terms and a constant current density of  $0.002 \text{ mA cm}^{-2}$  were used to account for the dark current density. Comparing to (b) and (d) shows that the fit is sensitive to the dark current density in the case of extremely low current densities as observed for LTON\_bare. Since even for LTON\_bare reasonable adjusted  $R^2$  values were obtained, a fitting model without dark current was used.

Table S2: Fitting Parameters for fits with one exponential Function

| Photocatalyst                                                           | Cocatalyst                             | $\tau$ [min] | $I_0$ [mA cm <sup>-2</sup> ] | R <sup>2</sup> | Reference                          |
|-------------------------------------------------------------------------|----------------------------------------|--------------|------------------------------|----------------|------------------------------------|
| LaTiO <sub>2</sub> N                                                    | Co <sub>3</sub> O <sub>4</sub>         | 2.19         | 2.89                         | 0.534          | Feng <i>et al.</i> <sup>6</sup>    |
| LaTiO <sub>2</sub> N                                                    | Co <sub>3</sub> O <sub>4</sub>         | 91.3         | 1.38                         | 0.758          | Mao <i>et al.</i> <sup>7</sup>     |
| Na <sub>0.1</sub> La <sub>0.9</sub> TiO <sub>2.2</sub> N <sub>0.8</sub> | Co <sub>3</sub> O <sub>4</sub>         | 42.8         | 0.367                        | 0.549          | Mao <i>et al.</i> <sup>7</sup>     |
| SrTaO <sub>2</sub> N                                                    | --                                     | 13.6         | 0.14                         | 0.721          | Zhong <i>et al.</i> <sup>4</sup>   |
| SrTaO <sub>2</sub> N                                                    | CoP <sub>i</sub>                       | 35.3         | 0.891                        | 0.756          | Zhong <i>et al.</i> <sup>4</sup>   |
| BaNbO <sub>2</sub> N                                                    | FeO <sub>x</sub>   Co(OH) <sub>x</sub> | 53.1         | 3.29                         | 0.828          | Seo <i>et al.</i> <sup>8</sup>     |
| TaON                                                                    | --                                     | 0.022        | 1.83                         | 0.986          | Higashi <i>et al.</i> <sup>9</sup> |
| TaON                                                                    | CoO <sub>x</sub>                       | 176          | 0.929                        | 0.117          | Higashi <i>et al.</i> <sup>9</sup> |
| TaON                                                                    | IrO <sub>x</sub>                       | 928          | 0.779                        | 0.772          | Higashi <i>et al.</i> <sup>9</sup> |
| TaON                                                                    | CoO <sub>x</sub>                       | 209          | 0.901                        | 0.104          | Higashi <i>et al.</i> <sup>9</sup> |
| Ta <sub>3</sub> N <sub>5</sub>                                          | --                                     | 13.6         | 0.479                        | 0.956          | He <i>et al.</i> <sup>5</sup>      |
| LaTiO <sub>2</sub> N                                                    | CoO <sub>x</sub> & NiO <sub>x</sub>    | 201          | 1.01                         | 0.859          | This work                          |
| LaTiO <sub>2</sub> N                                                    | --                                     | 118          | 0.0255                       | 0.335          | This work                          |
| LaTiO <sub>2</sub> N_dark                                               | CoO <sub>x</sub> & NiO <sub>x</sub>    | 0.60         | 0.552                        | 0.779          | This work                          |
| LaTiO <sub>2</sub> N_dark                                               | --                                     | 128          | 0.0136                       | 0.506          | This work                          |

Table S3: Fitting parameters for fits with two exponential functions.

| Photocatalyst                                                           | Cocatalyst                             | $\tau_{cp}$ | $I_{0,cp}$             | $\tau_{pc}$ | $I_{0,pc}$             | R <sup>2</sup> | Reference                          |
|-------------------------------------------------------------------------|----------------------------------------|-------------|------------------------|-------------|------------------------|----------------|------------------------------------|
|                                                                         |                                        | [min]       | [mA cm <sup>-2</sup> ] | [min]       | [mA cm <sup>-2</sup> ] |                |                                    |
| LaTiO <sub>2</sub> N                                                    | Co <sub>3</sub> O <sub>4</sub>         | 0.90        | 2.30                   | 235         | 0.851                  | 0.987          | Feng <i>et al.</i> <sup>6</sup>    |
| LaTiO <sub>2</sub> N                                                    | Co <sub>3</sub> O <sub>4</sub>         | 3.67        | 0.84                   | 192         | 0.947                  | 0.987          | Mao <i>et al.</i> <sup>7</sup>     |
| Na <sub>0.1</sub> La <sub>0.9</sub> TiO <sub>2.2</sub> N <sub>0.8</sub> | Co <sub>3</sub> O <sub>4</sub>         | 0.26        | 0.48                   | 112         | 0.193                  | 0.995          | Mao <i>et al.</i> <sup>7</sup>     |
| SrTaO <sub>2</sub> N                                                    | --                                     | 1.83        | 0.14                   | 62.9        | 0.051                  | 0.982          | Zhong <i>et al.</i> <sup>4</sup>   |
| SrTaO <sub>2</sub> N                                                    | CoP <sub>i</sub>                       | 1.47        | 0.55                   | 86.5        | 0.547                  | 0.973          | Zhong <i>et al.</i> <sup>4</sup>   |
| BaNbO <sub>2</sub> N                                                    | FeO <sub>x</sub>   Co(OH) <sub>x</sub> | 2.43        | 1.54                   | 86.62       | 2.570                  | 0.991          | Seo <i>et al.</i> <sup>8</sup>     |
| TaON                                                                    | --                                     | 0.85        | 0.27                   | 37.7        | 0.210                  | 0.999          | Higashi <i>et al.</i> <sup>9</sup> |
| TaON                                                                    | CoO <sub>x</sub>                       | 0.42        | 1.17                   | 1224        | 0.771                  | 1              | Higashi <i>et al.</i> <sup>9</sup> |
| TaON                                                                    | IrO <sub>x</sub>                       | 2.87        | 0.25                   | 130         | 0.454                  | 0.988          | Higashi <i>et al.</i> <sup>9</sup> |
| TaON                                                                    | CoO <sub>x</sub>                       | 0.29        | 1.05                   | 1538        | 0.768                  | 1              | Higashi <i>et al.</i> <sup>9</sup> |
| Ta <sub>3</sub> N <sub>5</sub>                                          | --                                     | 4.59        | 0.44                   | 89.2        | 0.127                  | 0.999          | He <i>et al.</i> <sup>5</sup>      |
| LaTiO <sub>2</sub> N                                                    | CoO <sub>x</sub> & NiO <sub>x</sub>    | 30.3        | 0.86                   | 387         | 0.609                  | 0.994          | This work                          |
| LaTiO <sub>2</sub> N                                                    | --                                     | 4.02        | 0.11                   | 335         | 0.013                  | 0.935          | This work                          |
| LaTiO <sub>2</sub> N_dark                                               | CoO <sub>x</sub> & NiO <sub>x</sub>    | 0.60        | 0.56                   | 130         | 0.016                  | 0.944          | This work                          |
| LaTiO <sub>2</sub> N_dark                                               | --                                     | 1.14        | 0.09                   | 172         | 0.011                  | 0.963          | This work                          |



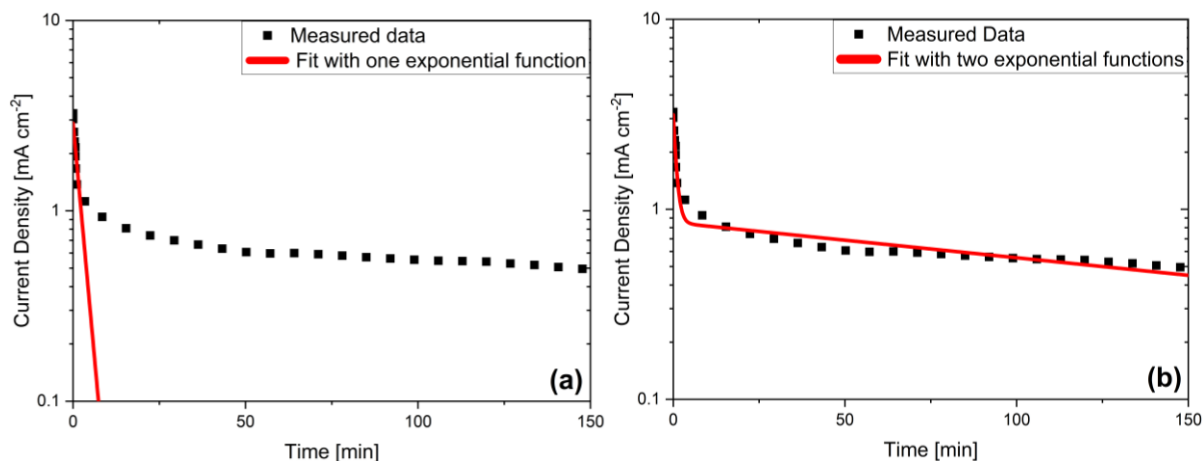

Figure S14: Chronoamperometry of LTON/Co<sub>3</sub>O<sub>4</sub> measured by Feng et al. fitted with a) one and b) two exponential functions, reproduced with permission.<sup>6</sup> Copyright 2025, Wiley.

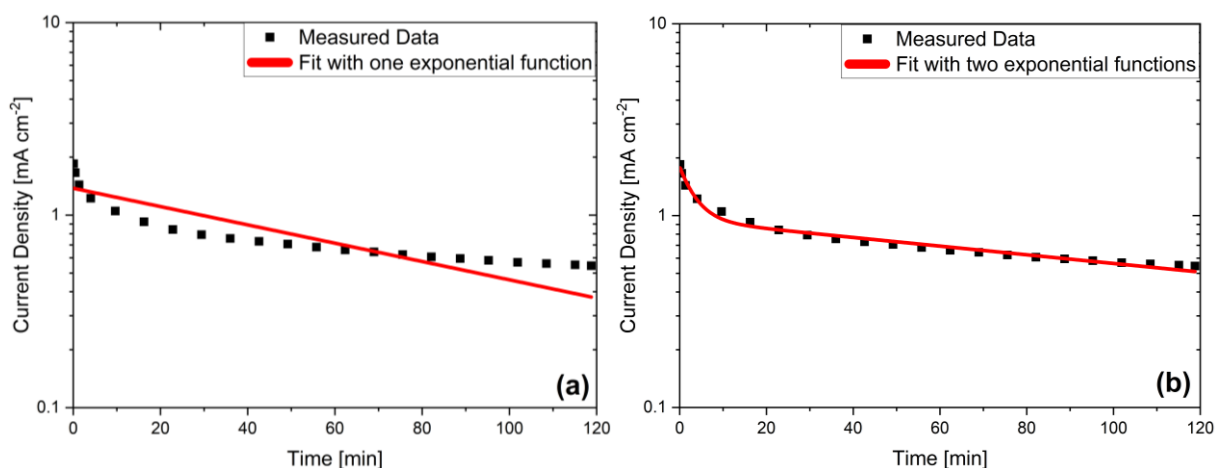

Figure S15: Chronoamperometry of LaTiO<sub>2</sub>N/Co<sub>3</sub>O<sub>4</sub> measured by Mao et al. fitted with a) one and b) two exponential functions, reproduced with permission.<sup>7</sup> Copyright 2025, Elsevier.

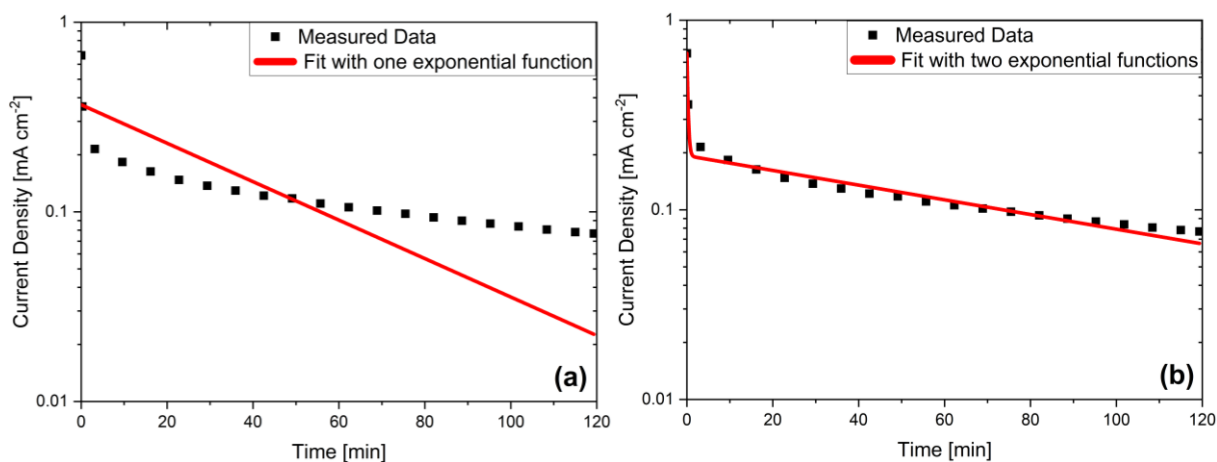

Figure S16: Chronoamperometry of Na<sub>0.1</sub>La<sub>0.9</sub>TiO<sub>2.2</sub>N<sub>0.8</sub>/Co<sub>3</sub>O<sub>4</sub> measured by Mao et al. fitted with a) one and b) two exponential functions, reproduced with permission.<sup>7</sup> Copyright 2025, Elsevier.

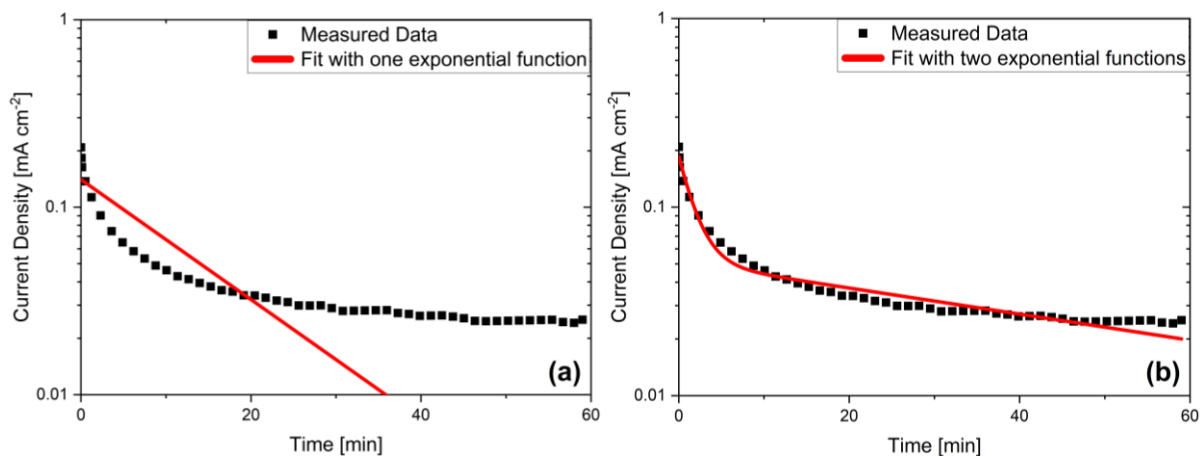

Figure S17: Chronoamperometry of SrTaO<sub>2</sub>N measured by Zhong et al. fitted with a) one and b) two exponential functions, reproduced with permission.<sup>4</sup> Copyright 2025, Wiley.

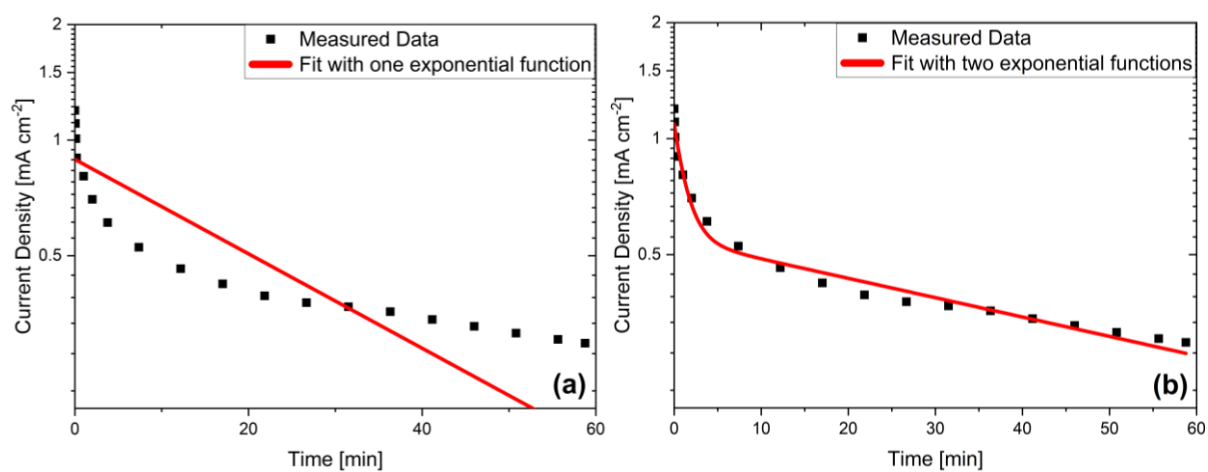

Figure S18: Chronoamperometry of SrTaO<sub>2</sub>N/CoPi measured by Zhong et al. fitted with a) one and b) two exponential functions, reproduced with permission.<sup>4</sup> Copyright 2025, Wiley.

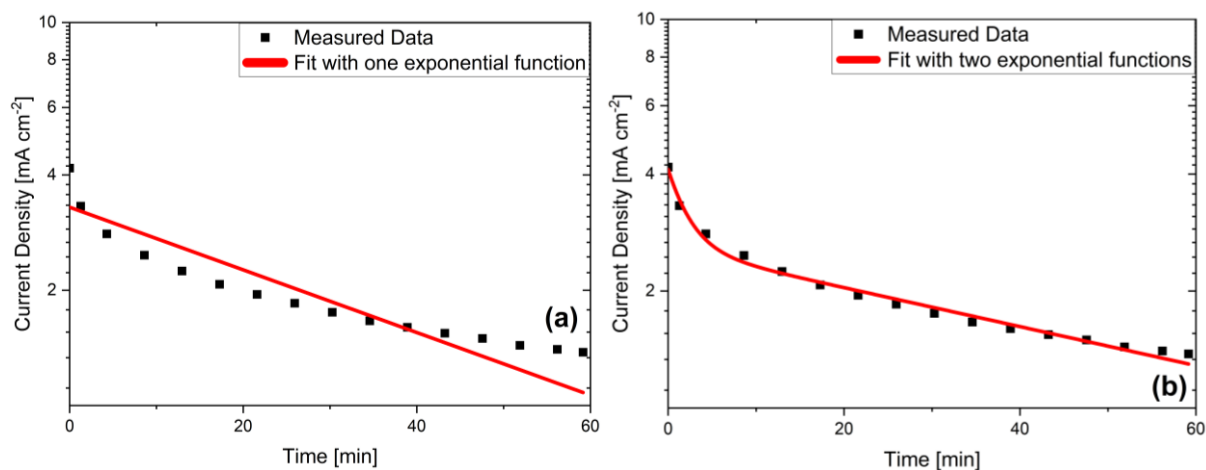

Figure S19: Chronoamperometry of BaNbO<sub>2</sub>N/FeO<sub>x</sub>/Co(OH)<sub>x</sub> measured by Seo et al. fitted with a) one and b) two exponential functions, reproduced with permission.<sup>8</sup> Copyright 2025, Wiley.

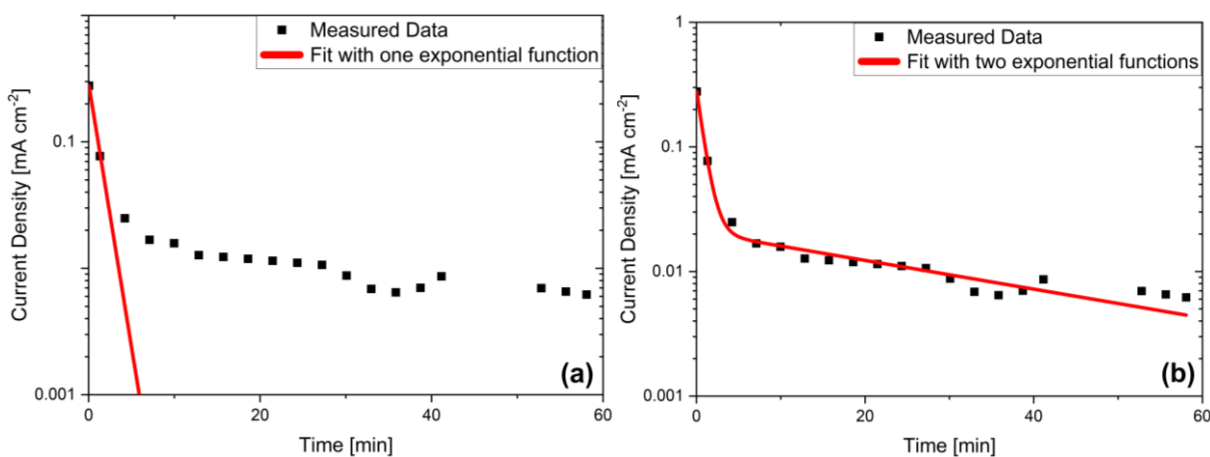

Figure S20: Chronoamperometry of TaON measured by Higashi et al. fitted with a) one and b) two exponential functions, reproduced with permission.<sup>9</sup> Copyright 2025, American Chemical Society.

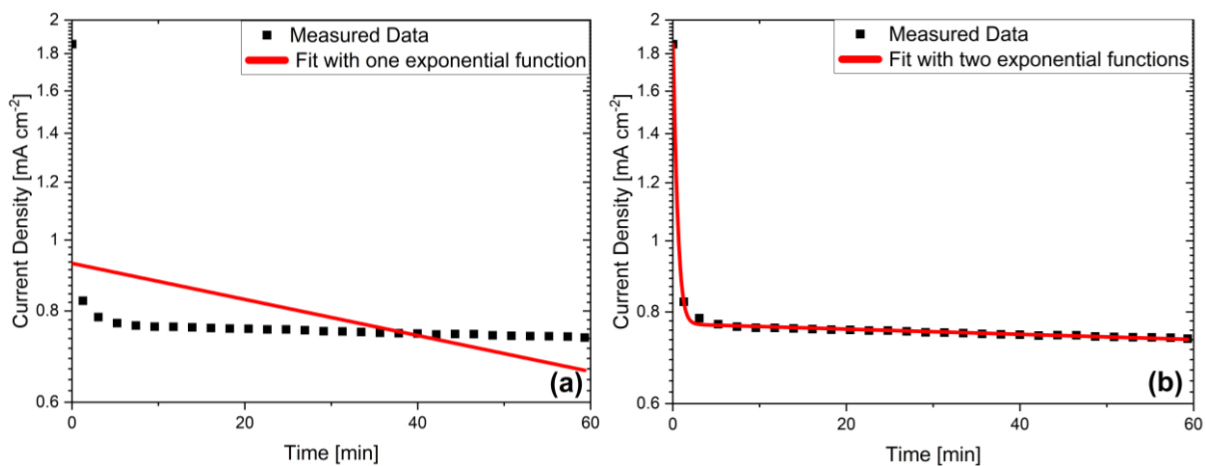

Figure S21: Chronoamperometry of TaON/CoO<sub>x</sub> measured by Higashi et al. fitted with a) one and b) two exponential functions, reproduced with permission.<sup>9</sup> Copyright 2025, American Chemical Society.

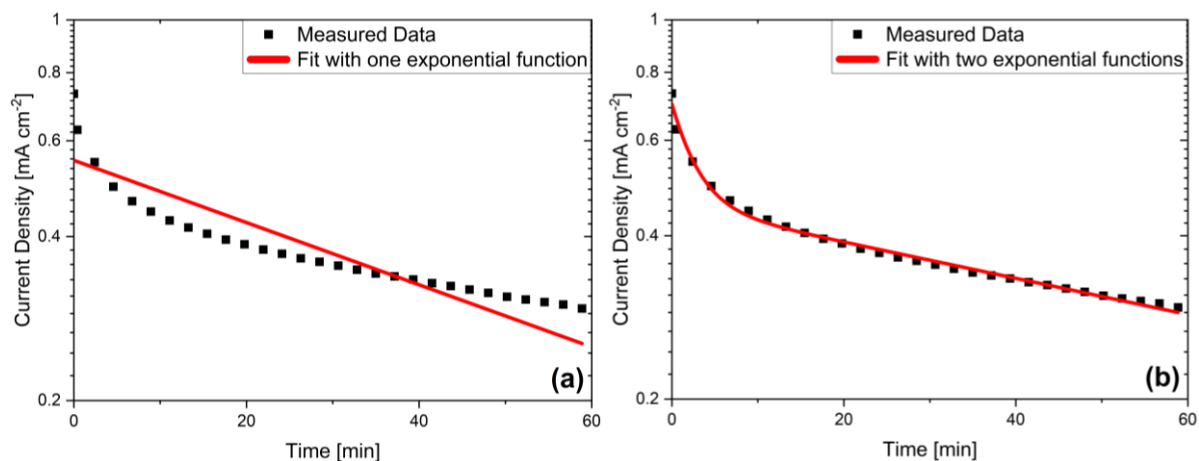

Figure S22: Chronoamperometry of TaON/IrO<sub>x</sub> measured by Higashi et al. fitted with a) one and b) two exponential functions, reproduced with permission.<sup>9</sup> Copyright 2025, American Chemical Society.

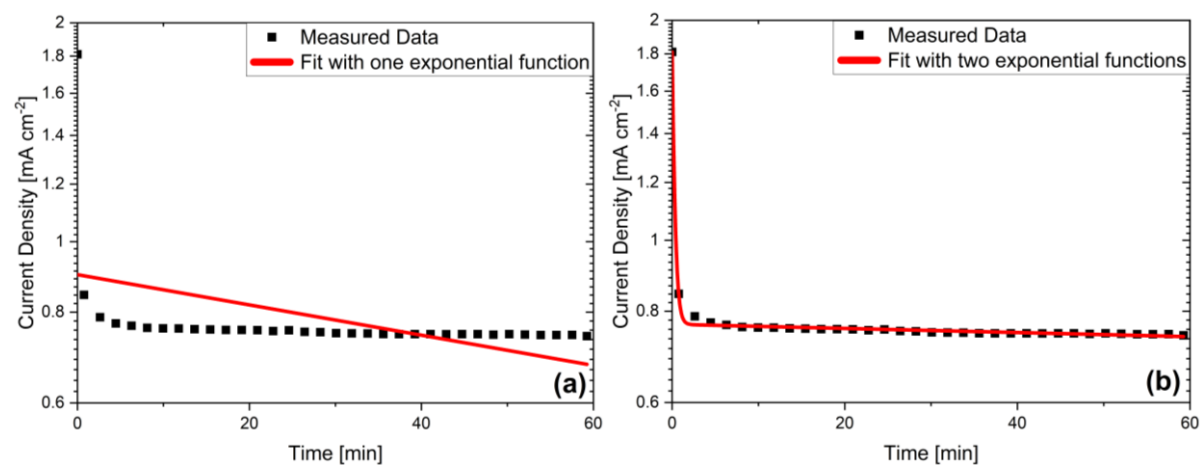

Figure S23: Chronoamperometry of TaON/CoO<sub>x</sub> measured by Higashi et al. fitted with a) one and b) two exponential functions, reproduced with permission.<sup>9</sup> Copyright 2025, American Chemical Society.

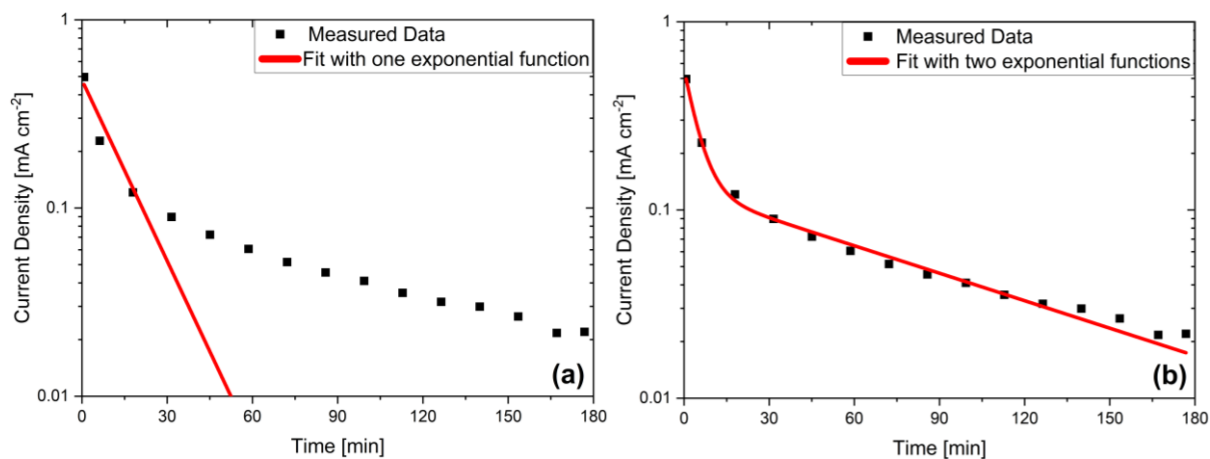

Figure S24: Chronoamperometry of Ta<sub>3</sub>N<sub>5</sub> measured by He et al. fitted with a) one and b) two exponential functions, reproduced with permission.<sup>5</sup> Copyright 2025, Elsevier.

Table S4: Capacitive behaviour of oxynitride photoanodes: capacitive charge  $Q_{cp60}$  and the total charge  $Q_{tot60}$  after 60 minutes and the fitting parameter  $I_{0,cp}$  and the measured current density at  $t=0$ .

| Photocatalyst                                                           | $Q_{cp60}$<br>[C] | Capacitance<br>[mF] | $Q_{tot60}$<br>[C] | Ratio<br>$Q_{cp60}/Q_{tot60}$<br>[%] | Ratio<br>$I_{0,cp}/j_{t=0}$<br>[%] | Reference                          |
|-------------------------------------------------------------------------|-------------------|---------------------|--------------------|--------------------------------------|------------------------------------|------------------------------------|
| LaTiO <sub>2</sub> N                                                    | 0.124             | 76.1                | 2.82               | 4.4                                  | 70.6                               | Feng <i>et al.</i> <sup>6</sup>    |
| LaTiO <sub>2</sub> N                                                    | 0.186             | 114                 | 3.12               | 6.0                                  | 45.7                               | Mao <i>et al.</i> <sup>7</sup>     |
| Na <sub>0.1</sub> La <sub>0.9</sub> TiO <sub>2.2</sub> N <sub>0.8</sub> | 0.007             | 4.3                 | 0.54               | 1.4                                  | 71.5                               | Mao <i>et al.</i> <sup>7</sup>     |
| SrTaO <sub>2</sub> N                                                    | 0.015             | 9.2                 | 0.132              | 11.2                                 | 64.6                               | Zhong <i>et al.</i> <sup>4</sup>   |
| SrTaO <sub>2</sub> N                                                    | 0.048             | 29.4                | 1.446              | 3.3                                  | 45.6                               | Zhong <i>et al.</i> <sup>4</sup>   |
| BaNbO <sub>2</sub> N                                                    | 0.224             | 137                 | 6.846              | 3.3                                  | 37.0                               | Seo <i>et al.</i> <sup>8</sup>     |
| TaON                                                                    | 0.014             | 8.6                 | 0.055              | 25.0                                 | 97.1                               | Higashi <i>et al.</i> <sup>9</sup> |
| TaON                                                                    | 0.029             | 17.8                | 2.72               | 1.1                                  | 63.1                               | Higashi <i>et al.</i> <sup>9</sup> |
| TaON                                                                    | 0.042             | 25.8                | 1.332              | 3.2                                  | 33.6                               | Higashi <i>et al.</i> <sup>9</sup> |
| TaON                                                                    | 0.018             | 11.0                | 2.706              | 0.68                                 | 57.8                               | Higashi <i>et al.</i> <sup>9</sup> |
| Ta <sub>3</sub> N <sub>5</sub>                                          | 0.12              | 7.4                 | 0.474              | 25.3                                 | 87.7                               | He <i>et al.</i> <sup>5</sup>      |
| LaTiO <sub>2</sub> N_cocats                                             | 1.562             | 958                 | 3.895              | 40.1                                 | 31.0                               | This work                          |
| LaTiO <sub>2</sub> N_necked                                             | 0.026             | 16.3                | 0.077              | 34.0                                 | 40.3                               | This work                          |
| LaTiO <sub>2</sub> N_cocats_dark                                        | 0.020             | 16.4                | 0.061              | 32.8                                 | 96.9                               | This work                          |
| LaTiO <sub>2</sub> N_necked_dark                                        | 0.006             | 4.9                 | 0.036              | 16.7                                 | 67.7                               | This work                          |

The variations within the same material system can be attributed to differences in the electrode designs, including the different cocatalysts, and measurement set-ups, since parameters such as electrolyte, photoactive material, photoanode size, distance between working and counter electrode may influence the capacitance of the whole system.

Table S5: Capacitive charge and capacitance of LTON based photoanodes with different cocatalyst layers, with and without illumination.

|                  | Under Illumination        |                     | No Illumination           |                     | Ratio [%] |
|------------------|---------------------------|---------------------|---------------------------|---------------------|-----------|
|                  | Capacitive Charge<br>[As] | Capacitance<br>[mF] | Capacitive<br>Charge [As] | Capacitance<br>[mF] |           |
| LTON+Ti+Ta+Ni+Co | 1.56                      | 958                 | 0.020                     | 16.4                | 1.7       |
| LTON+Ti+Ta+Ni    | 0.101                     | 62.0                | 0.008                     | 6.2                 | 10        |
| LTON+Ti+Ta+Co    | 1.39                      | 858                 | 0.050                     | 40.1                | 4.7       |
| LTON+Ti+Ni+Co    | 1.09                      | 673                 | 0.017                     | 14.0                | 2.0       |
| LTON+Ti+Ta       | 0.044                     | 27.0                | 0.003                     | 2.0                 | 7.4       |
| LTON+Ti+Ni       | 0.116                     | 71.0                | 0.007                     | 5.3                 | 7.5       |
| LTON+Ti+Co       | 1.06                      | 652                 | 0.014                     | 10.8                | 1.7       |
| LTON+Ti          | 0.026                     | 16.3                | 0.006                     | 4.9                 | 41.2      |

Investigating this effect more closely by repeating these experiments with and without illumination after the application of each cocatalyst layer, we find that that the difference between the capacitance obtained from the measurement under illumination and the measurement in the dark increased after the addition of each cocatalyst layer. This indicates that the different cocatalysts and their interactions between them are responsible for the large increase of the capacitance of the photoanode under illumination.

Table S6: Current retentions after 60 minutes based on  $j_{t=0}$  and the fitting parameter  $I_{0,pc}$  as initial values.

| Photocatalyst                                                           | $j_{t=0}$<br>[mA cm <sup>-2</sup> ] | $I_{0,pc}$<br>[mA cm <sup>-2</sup> ] | $j_{t=60}$<br>[mA cm <sup>-2</sup> ] | Ret <sub>t=0</sub> [%] | Ret <sub>t=60,pc</sub> [%] | Reference                          |
|-------------------------------------------------------------------------|-------------------------------------|--------------------------------------|--------------------------------------|------------------------|----------------------------|------------------------------------|
| LaTiO <sub>2</sub> N                                                    | 3.253                               | 0.851                                | 0.6                                  | 18.4                   | 70.5                       | Feng <i>et al.</i> <sup>6</sup>    |
| LaTiO <sub>2</sub> N                                                    | 1.849                               | 0.947                                | 0.67                                 | 36.2                   | 70.8                       | Mao <i>et al.</i> <sup>7</sup>     |
| Na <sub>0.1</sub> La <sub>0.9</sub> TiO <sub>2.2</sub> N <sub>0.8</sub> | 0.669                               | 0.193                                | 0.108                                | 16.1                   | 56.0                       | Mao <i>et al.</i> <sup>7</sup>     |
| SrTaO <sub>2</sub> N                                                    | 0.209                               | 0.051                                | 0.024                                | 11.5                   | 47.1                       | Zhong <i>et al.</i> <sup>4</sup>   |
| SrTaO <sub>2</sub> N                                                    | 1.196                               | 0.547                                | 0.294                                | 24.6                   | 53.7                       | Zhong <i>et al.</i> <sup>4</sup>   |
| BaNbO <sub>2</sub> N                                                    | 4.167                               | 2.570                                | 1.375                                | 33.0                   | 53.5                       | Seo <i>et al.</i> <sup>8</sup>     |
| TaON                                                                    | 0.278                               | 0.210                                | 0.006                                | 2.2                    | 2.9                        | Higashi <i>et al.</i> <sup>9</sup> |
| TaON                                                                    | 1.854                               | 0.771                                | 0.763                                | 41.2                   | 99.0                       | Higashi <i>et al.</i> <sup>9</sup> |
| TaON                                                                    | 0.732                               | 0.454                                | 0.292                                | 39.9                   | 64.3                       | Higashi <i>et al.</i> <sup>9</sup> |
| TaON                                                                    | 1.811                               | 0.768                                | 0.739                                | 40.8                   | 96.2                       | Higashi <i>et al.</i> <sup>9</sup> |
| Ta <sub>3</sub> N <sub>5</sub>                                          | 0.497                               | 0.127                                | 0.06                                 | 12.1                   | 47.2                       | He <i>et al.</i> <sup>5</sup>      |
| LaTiO <sub>2</sub> N_cocats                                             | 2.772                               | 0.609                                | 0.775                                | 28.0                   | 127.3                      | This work                          |
| LaTiO <sub>2</sub> N_necked                                             | 0.273                               | 0.013                                | 0.013                                | 4.8                    | 98.3                       | This work                          |
| LaTiO <sub>2</sub> N_cocats_dark                                        | 0.579                               | 0.016                                | 0.007                                | 1.2                    | 43.8                       | This work                          |
| LaTiO <sub>2</sub> N_necked_dark                                        | 0.133                               | 0.011                                | 0.007                                | 5.6                    | 63.6                       | This work                          |

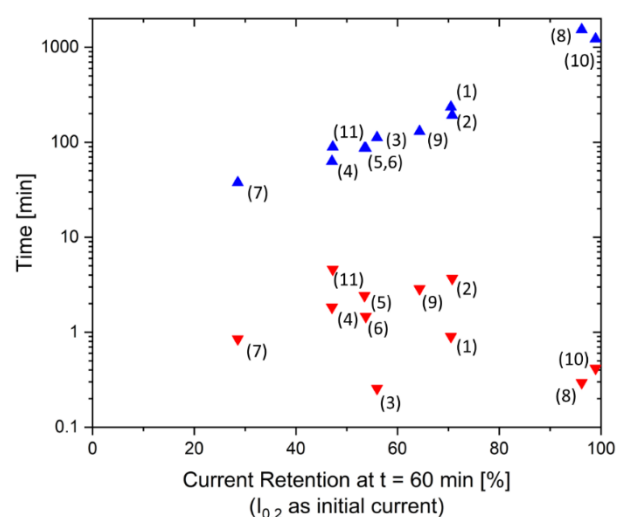

Figure S25: Time constants of the fit with two exponential terms as a function of the current retention after 60 minutes based on the fitting parameter  $I_{0,2}$  as  $j_{max}$  (red triangles:  $\tau_{cp}$  and blue triangles:  $\tau_{pc}$ ). (1) Feng *et al.*, <sup>[4]</sup> (2 & 3) Mao *et al.*, <sup>[5]</sup> (4 & 5) Zhong *et al.*, <sup>[6]</sup> (6) Seo *et al.*, <sup>[7]</sup> (7 – 10) Higashi *et al.*, <sup>[8]</sup> (11) He *et al.* <sup>[9]</sup>

Table S7: Stability of LTON-photoanodes decorated with various cocatalyst combinations obtained by fitting 7h chronoamperometries (Figure S8b) by Equation 4

| Necking/Cocatalyst system | $\tau_{pc}$ [h] | $I_{0,pc}$ [mA cm.2] | Ret <sub>I0pc</sub> [%] |
|---------------------------|-----------------|----------------------|-------------------------|
| Ti                        | 5.58            | 0.013                | 48.3                    |
| Ti+Ta                     | 6.43            | 0.015                | 53.3                    |
| Ti+Ni                     | 5.73            | 0.148                | 37.2                    |
| Ti+Co                     | 5.05            | 0.569                | 30.4                    |
| Ti+Ta+Ni                  | 5.34            | 0.136                | 34.6                    |
| Ti+Ta+Co                  | 5.71            | 0.607                | 33.9                    |
| Ti+Ni+Co                  | 3.92            | 0.723                | 24.0                    |
| Ti+Ta+Ni+Co               | 6.27            | 0.767                | 36.1                    |

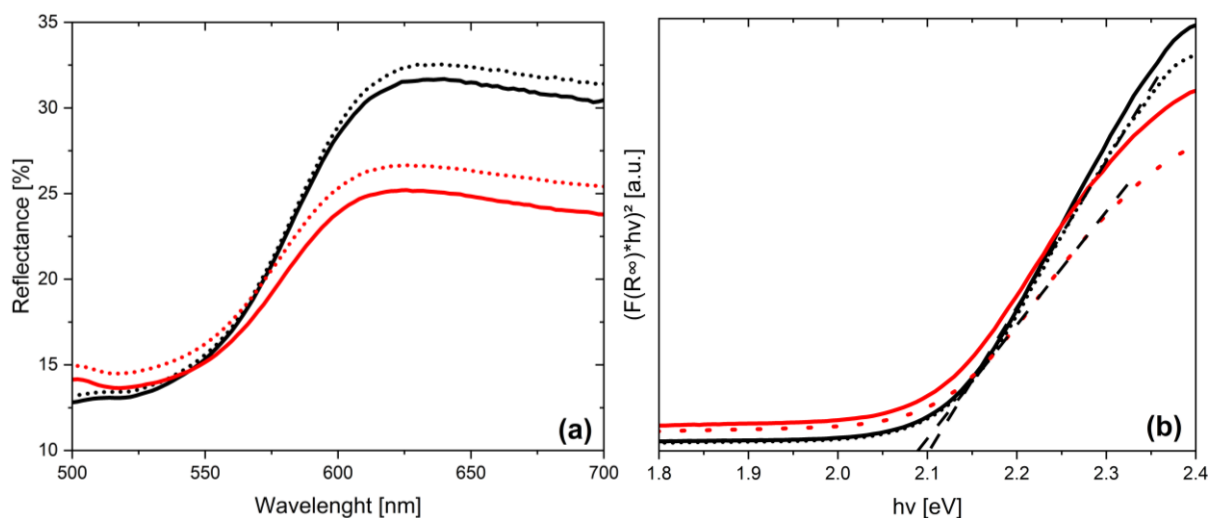

Figure S26: (a) Diffuse Reflectance spectra and (b) Tauc-Plots of the Kubelka-Munk Functions LTON\_bare photoanodes (black) and LTON\_cocats photoanodes (red), before (full line) and after stability testing (dotted line).

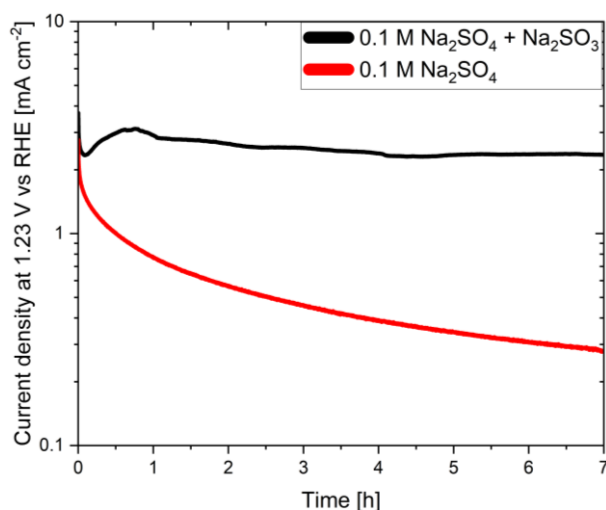

Figure S27: 7 h chronoamperometries at 1.23 V vs RHE and under 1 sun illumination of LTON\_cocats photoanodes with and without sacrificial agent in the electrolyte.

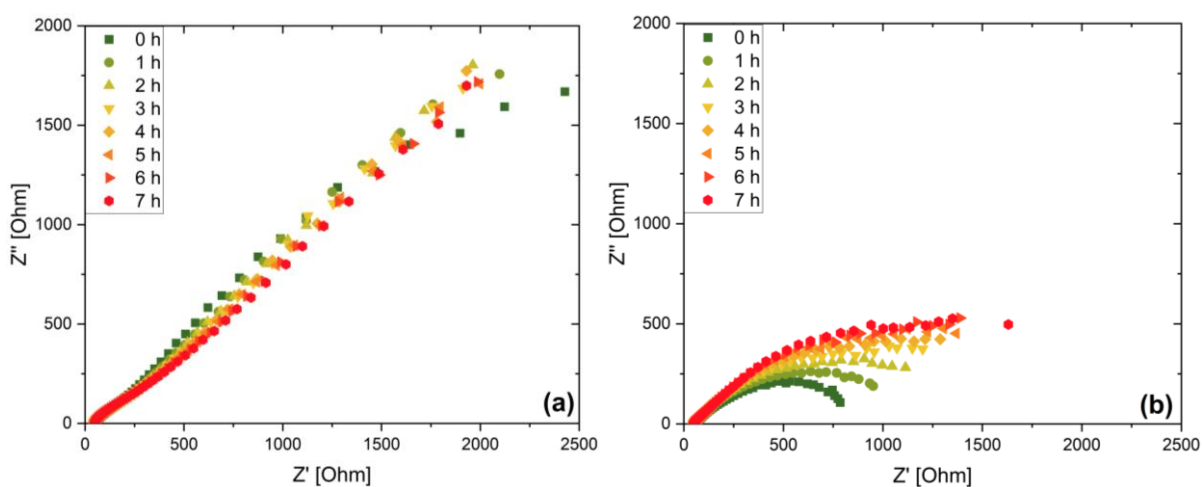

Figure S28: Electrical impedance spectroscopy performed of a) LTON\_bare and b) LTON\_cocats photoanodes after each hour of chronoamperometry under illumination at 1.23 V vs RHE

Table S8: Surface composition of LTON\_bare photoanodes before and after 7 h chronoamperometry, labelled as after OER, measured via XPS.

| Sample                 | Ti<br>[atom. %] | La<br>[atom. %] | O<br>[atom. %] | N<br>[atom. %] | thereof N <sup>3-</sup><br>[atom. %] | N <sup>3-</sup> per<br>formula unit |
|------------------------|-----------------|-----------------|----------------|----------------|--------------------------------------|-------------------------------------|
| LTON_bare<br>pristine  | 18.39           | 10.77           | 60.87          | 9.94           | 7.52                                 | 0.69                                |
| LTON_bare<br>after OER | 16.86           | 8.75            | 67.58          | 6.79           | 5.20                                 | 0.59                                |

Since the O and Ti signals contain contributions from the TiO<sub>2</sub> necking, the La content is suited best as reference. Consequently the amount of N<sup>3-</sup> per formula unit was derived from the ratio between the La and the N<sup>3-</sup>. The additional N<sub>2</sub> contribution comes from the nitrogen trapped in the closed pores of LTON during thermal amonolysis.

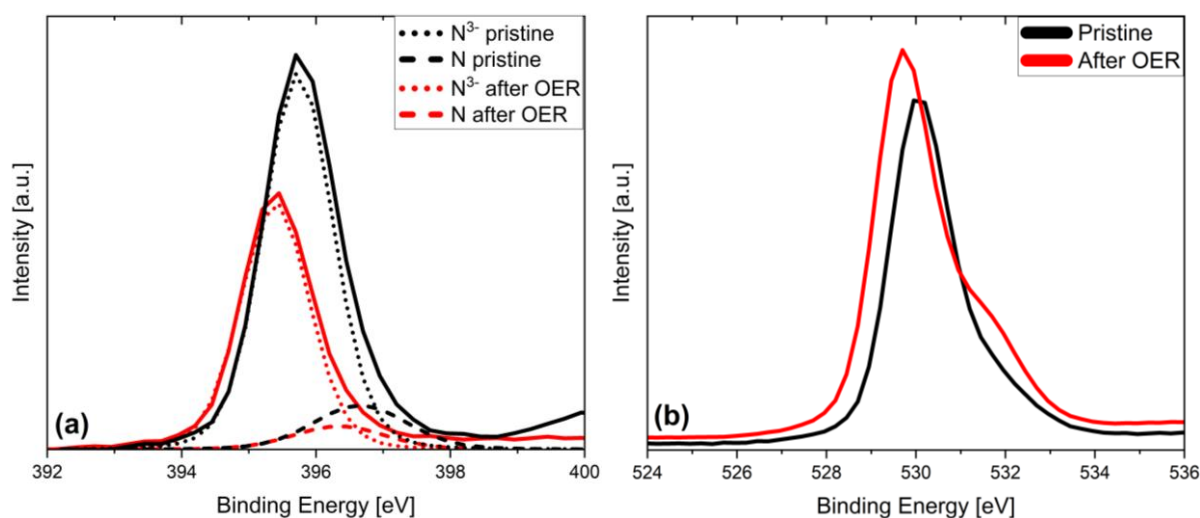

Figure S29: High resolution XPS spectra of a) N1s and b) O1s for pristine and after 7 h OER LTON\_bare photoanodes

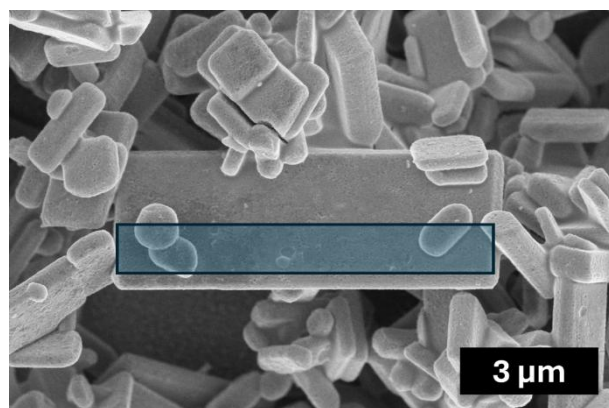

Figure S30: SEM image of a LTON\_cocats photanode (top view). The blue box shows the location of FIB lamella preparation.



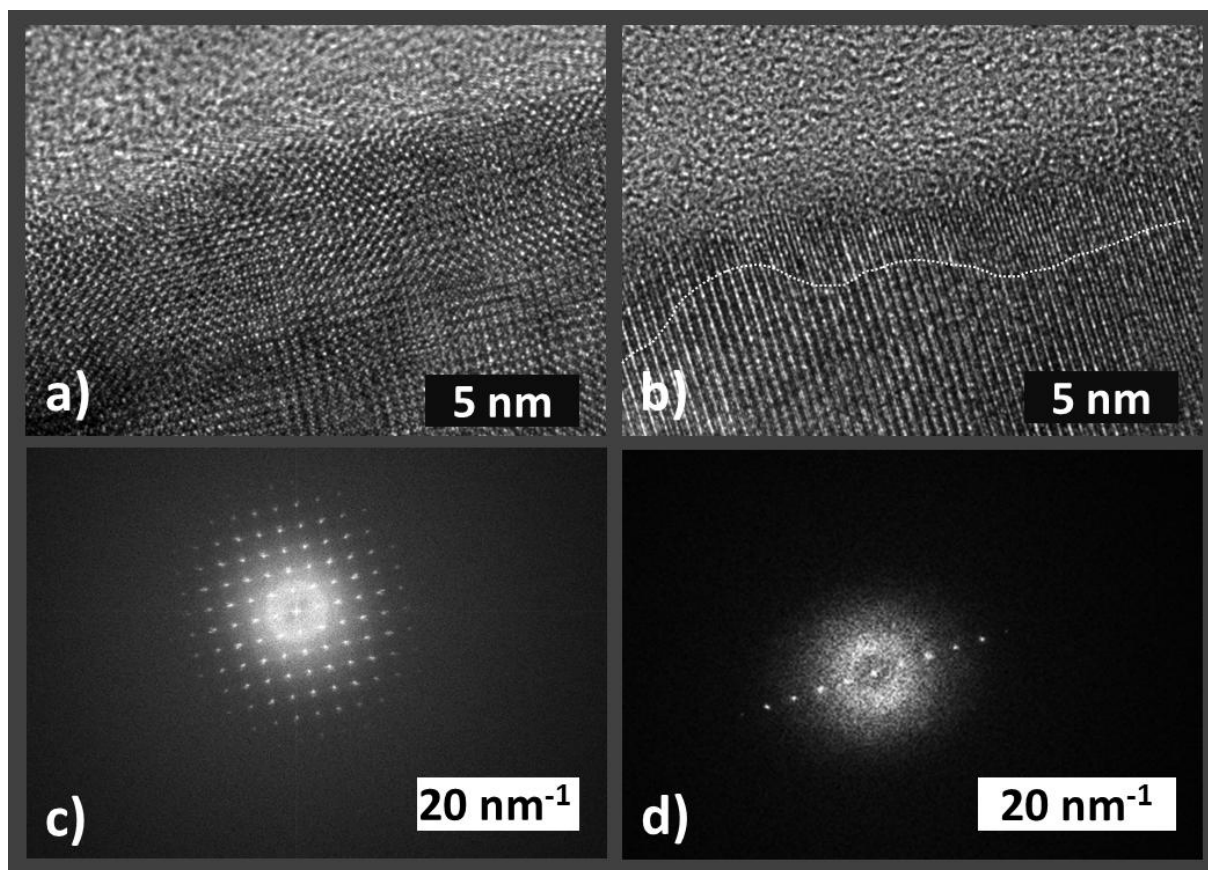

Figure S31: HREM images of LTON particle surfaces obtained from lamella extracted from a) a pristine LTON\_cocats photoanode and b) after 7 h OER. c) and d) represent the corresponding Fast Fourier Transforms (FFT) to a) and b). The FFT show that the particles were not cut in the same crystal directions, therefore showing different crystalline patterns. In the pristine sample the crystal planes extend up to the particle edge. After OER the crystalline pattern is not continuous, but additional planes appear towards the particle surface. The dotted line serves as guide to the eye.

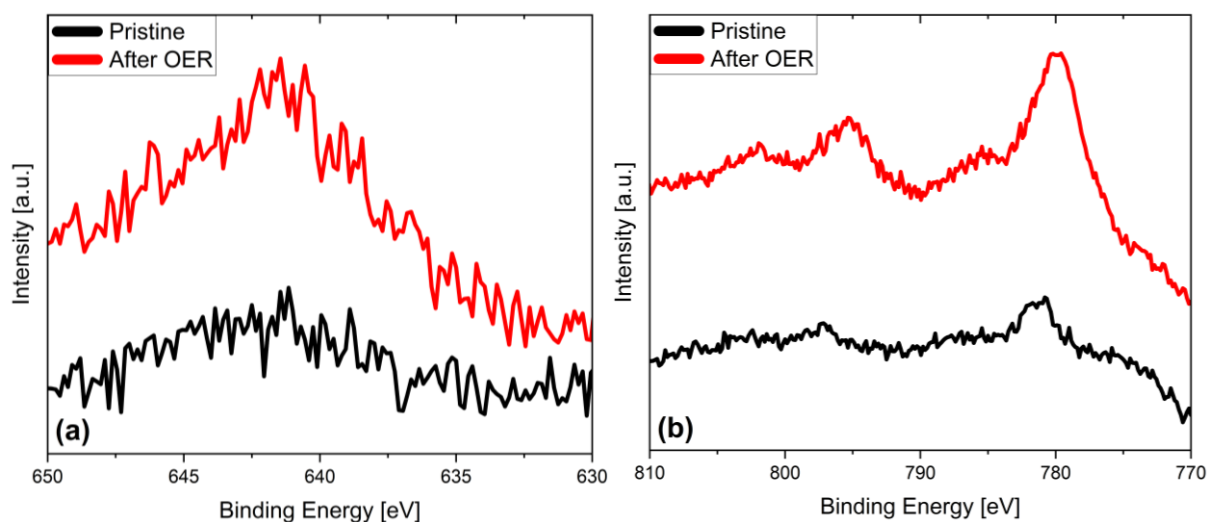

Figure S32: High resolution XPS spectra of a) NiLMM Auger and b) Co2p

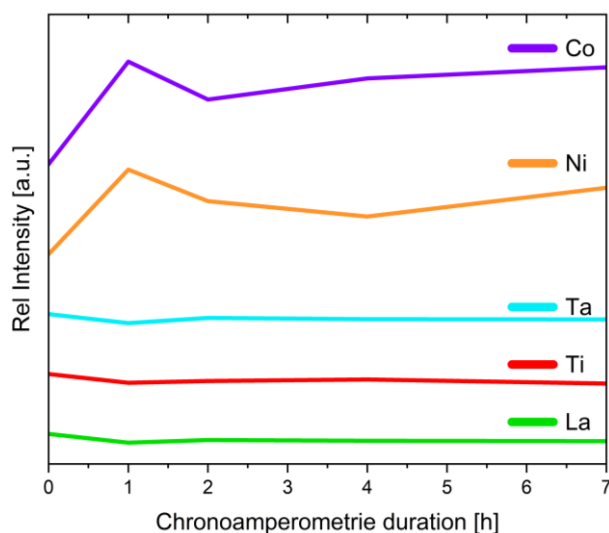

Figure S33: Evolution of the surface composition (Co, Ni, La, Ta and Ti) of LTON\_cocats photoanodes as a function of the chronoamperometry duration (OER under illumination). The edge intensities are reported relative to their intensity at  $t=0$  with arbitrary offsets for reasons of readability. The XPS spectra are shown in Figure S6.

## References

1. V. Benavente Llorente, K. J. Jenewein, M. Bierling, A. Körner, A. Hutzler, A. Kormányos and S. Cherevko, *The Journal of Physical Chemistry C*, 2023, **127**, 19687-19697.
2. F. M. Toma, J. K. Cooper, V. Kunzelmann, M. T. McDowell, J. Yu, D. M. Larson, N. J. Borys, C. Abelyan, J. W. Beeman, K. M. Yu, J. Yang, L. Chen, M. R. Shaner, J. Spurgeon, F. A. Houle, K. A. Persson and I. D. Sharp, *Nature Communications*, 2016, **7**, 12012.
3. Z. Zhu, M. Daboczi, M. Chen, Y. Xuan, X. Liu and S. Eslava, *Nat Commun*, 2024, **15**, 2791.
4. Y. Zhong, Z. Li, X. Zhao, T. Fang, H. Huang, Q. Qian, X. Chang, P. Wang, S. Yan, Z. Yu and Z. Zou, *Advanced Functional Materials*, 2016, **26**, 7156-7163.
5. Y. He, James E. Thorne, Cheng H. Wu, P. Ma, C. Du, Q. Dong, J. Guo and D. Wang, *Chem*, 2016, **1**, 640-655.
6. J. Feng, W. Luo, T. Fang, H. Lv, Z. Wang, J. Gao, W. Liu, T. Yu, Z. Li and Z. Zou, *Advanced Functional Materials*, 2014, **24**, 3535-3542.
7. L. Mao, X. Cai, H. Gao, X. Diao and J. Zhang, *Nano Energy*, 2017, **39**, 172-182.
8. J. Seo, T. Hisatomi, M. Nakabayashi, N. Shibata, T. Minegishi, M. Katayama and K. Domen, *Advanced Energy Materials*, 2018, **8**, 1800094.
9. M. Higashi, K. Domen and R. Abe, *J Am Chem Soc*, 2012, **134**, 6968-6971.
